# Supplementary material for: Adolescents’ physical activity trends over the years: a three-cohort study based on the Health Behaviour in School-aged Children (HBSC) Portuguese survey
Source: PubMed Central journal article supplement — BMJ Open. 2014 Oct 6;4(10):e006012. doi: 10.1136/bmjopen-2014-006012 (PMC4187657; doi:10.1136/bmjopen-2014-006012), 2014-10-06
Supplement: bmjopen-2014-006012.draft_revisions.pdf [file bmjopen-2014-006012.draft_revisions.pdf]

# BMJ Open

## Adolescents' physical activity trends over the years. A three-cohort study based on the Health Behaviour in School-aged Children (HBSC) Portuguese survey

|                                 |                                                                                                                                                                                                                                                                                                         |
|---------------------------------|---------------------------------------------------------------------------------------------------------------------------------------------------------------------------------------------------------------------------------------------------------------------------------------------------------|
| Journal:                        | <i>BMJ Open</i>                                                                                                                                                                                                                                                                                         |
| Manuscript ID:                  | bmjopen-2014-006012                                                                                                                                                                                                                                                                                     |
| Article Type:                   | Research                                                                                                                                                                                                                                                                                                |
| Date Submitted by the Author:   | 01-Jul-2014                                                                                                                                                                                                                                                                                             |
| Complete List of Authors:       | Marques, Adilson; Centro Interdisciplinar de Estudo da Performance Humana, Faculdade de Motricidade Humana, Universidade de Lisboa, ; Projeto Aventura Social, Gaspar de Matos, Margarida; Centro de Malária e Outras Doenças Tropicais (CMDT), Universidade Nova de Lisboa, ; Projeto Aventura Social, |
| <b>Primary Subject Heading</b>: | Epidemiology                                                                                                                                                                                                                                                                                            |
| Secondary Subject Heading:      | Sports and exercise medicine                                                                                                                                                                                                                                                                            |
| Keywords:                       | EPIDEMIOLOGY, PREVENTIVE MEDICINE, SPORTS MEDICINE                                                                                                                                                                                                                                                      |
|                                 |                                                                                                                                                                                                                                                                                                         |

SCHOLARONE™  
Manuscripts

## Title page

Adolescents' physical activity trends over the years. A three-cohort study based on the Health Behaviour in School-aged Children (HBSC) Portuguese survey

Adilson Marques<sup>1,2</sup>, Margarida Gaspar de Matos<sup>2,3</sup>

<sup>1</sup> Projeto Aventura Social, Lisboa, Portugal

<sup>2</sup> Centro Interdisciplinar de Estudo da Performance Humana, Faculdade de Motricidade Humana, Faculdade de Motricidade Humana, Universidade de Lisboa

<sup>3</sup> Centro de Malária e Outras Doenças Tropicais (CMDT), Lisboa, Portugal

Corresponding author: Adilson Marques, CIPER, Faculdade de Motricidade Humana, Universidade de Lisboa, Estrada da Costa, 1499-002, Cruz Quebrada, Dafundo, Portuga.

Telephone: (00351) 214149100, E-mail: amarques@fmh.ulisboa.pt

Keywords: epidemiology; preventive medicine, sports medicine

Word count for body text: 2570 words

## Abstract

**Objective:** Many young people do not practice enough physical activity (PA) to benefit their health. The study aimed to investigate the prevalence of PA and understand the trends between 2002 and 2010, using three-cohort of representative samples of Portuguese adolescents.

**Design, setting and participants:** Participants were 8483 adolescents (4067 boys, 4416 girls), that participated in the Health Behavior in School-aged Children Portuguese survey in 2002, 2006 and 2010.

**Design, setting and participants:** A questionnaire was used to collected data of physical activity. Analyses were run separately for boys and girls.

**Results:** For the boys, at the age of 15-17 they reported practicing  $3.5 \pm 1.9$  times a week in 2002,  $3.9 \pm 1.9$  in 2006 and  $3.8 \pm 1.9$  in 2010, with a significant increase from 2002 to 2006/2010 ( $p < 0.05$ ). PA practice during the last 7 days decreased from  $4.2 \pm 2.1$  to  $3.9 \pm 1.9$  between 2002 and 2006 ( $p < 0.001$ ) and decreased  $4.4 \pm 2.1$  to  $3.8 \pm 1.9$  between 2006 and 2010 ( $p < 0.001$ ). Among girls, PA practices during the last 7 days declined significantly from  $3.5 \pm 1.9$  to  $2.7 \pm 1.7$  between 2002 and 2006 ( $p < 0.001$ ), and from  $3.3 \pm 1.9$  to  $2.9 \pm 1.7$  between 2006 and 2010 ( $p < 0.001$ ).

**Conclusions:** The study points to age as a factor related to diminished PA participation. The study also revealed that the prevalence of PA has decreased over the years for the same age groups.

### Strengths and limitations of this study

– Data from a representative sample was collected from three different cohorts (2002, 2006 and 2010), using a standard protocol, which allows for comparisons and for

1  
2  
3 understanding of the differences of PA over the years in two different age groups of boys and  
4  
5 girls.

6  
7 – Measurements of PA were based on self-report. Self-report generally has limited  
8  
9 reliability and validity. So, the use of accurate objective measures is preferable, but it is not  
10  
11 often feasible in epidemiological studies with large samples.  
12

13  
14 – Boys and girls do not practice enough physical activity to meet the recommended  
15  
16 levels of 60 minutes in moderate to vigorous intensity on all or most days of the week. From a  
17  
18 public health perspective there is a need to augment the time spent on physical activity.  
19

20  
21 – Soccer is the most practiced sports activity among boys and older girls. Thus, when  
22  
23 considering an intervention aimed to increase PA, soccer should be considered as an activity  
24  
25 that attracts adolescents.  
26  
27  
28  
29  
30  
31  
32  
33  
34  
35  
36  
37  
38  
39  
40  
41  
42  
43  
44  
45  
46  
47  
48  
49  
50  
51  
52  
53  
54  
55  
56  
57  
58  
59  
60

## INTRODUCTION

Young people's participation in physical activity (PA) is associated with health benefits, specifically improved bone mineral density, aerobic fitness, muscular strength, endurance, cardiovascular risk factor and mental health.[1] There is also a negative relationship between PA and careless nutrition, overweight and obesity among young people.[2, 3] Additionally, PA incorporated as a personal habit at a young age may persist into adulthood.[4] Thus, current guidelines from the World Health Organization (WHO) recommend that young people should engage in at least 60 minutes of PA in moderate to vigorous (MVPA) intensity on all or most days of the week.[5]

In spite of the health benefits, data suggests that many young people are not engaging in PA of sufficient length and intensity to benefit their health.[6, 7] The Portuguese figures are quite dramatic, revealing that only 36% of children aged 10-11 and 4% of adolescents aged 16-17 were considered sufficiently active.[8] Besides the lower levels of PA, the prevalence of active children and adolescents tended to decrease with age, particularly among girls.

In order to intervene and reverse this situation, it is important to understand the trends of PA over the years as well as the PA practices of adolescents. Nevertheless, most studies are cross sectional[8, 9] and results can only be interpreted in the light of the period in which they were collected. Since little is known about the PA practices of adolescents and how they have evolved over the years, studies that allow researchers to compare patterns and practices of PA are needed. Therefore, the present study, using three-cohort of representative samples of Portuguese adolescents, aimed to investigate the prevalence of PA among Portuguese adolescents and understand how it has changed between 2002 and 2010.

## METHODS

## Participants

A proportionate nationally representative sample of 8485 adolescents (4067 boys, 4416 girls), randomly selected from grades 6 and 10 participated in the Health Behaviour in School-aged Children (HBSC) Portuguese survey in 2002 (n=3023), 2006 (n=2556), and 2010 (n=2904).[10-12] HBSC Portugal is one of 43 countries and regions across Europe and North America that make up the HBSC Network. HBSC collects data every four years on children's and adolescent's health and well-being, social environments and health behaviors. Data is used at a national and international level to add new vision into young people's health and well-being, understand the social and psychological determinants of health, and incorporate policies to improve young people's lives. The methodological aspects of the HBSC study are well developed and published internationally.[13] The study received approval from the Ethical Committee of Lisbon Medical School and the Portuguese National Data Protection System. All school administrators gave their consent, legal guardians gave written informed consent, and students provided assent.

## Measures

To assess PA, adolescents were provided with a common definition of PA,[14] and then were asked "How many days did you practice PA during the last 7 days?" Answers were given on an 8-point scale (1 = none to 8 = daily). Seven days of PA recall is shown to be reliable and valid for use in research on PA in adolescents.[15] Adolescents were also asked if they practiced regular PA during the last 6 months. Answers were yes ( $\geq 3$  times a weeks) or no ( $<3$  times a week). The item has a high reliability, with intraclass correlation coefficients (one-week interval) of 0.95. Adolescents were then asked about the sports activity they usually practiced in organized or non-organized contexts.

## Procedures

Questionnaires were administered in schools in January 2002, 2006 and 2010, and were answered anonymously. Participation in the study was voluntary. The administration of the surveys was conducted according to standard guidelines from the HBSC survey protocol[13] and it was carried out by trained school teachers during class time.

### Analysis

Adolescents were grouped into two age groups (11-13 and 15-17). Descriptive statistics were calculated for all variables (means, standard deviation and percentages) for the entire sample and according to HBSC survey years (2002, 2006, and 2010), age group, and sex. ANOVA and chi-square were used to assess the differences among HBSC survey years in each age group. Independent t-tests and chi-square were used to compare adolescents from different cohorts. All statistical analyses were performed using IBM SPSS Statistics 20.0. The level of significance was set at 0.05.

## RESULTS

Sample characteristics and displayed in table 1.

Table 1. Characteristics of participants.

|              | Total |      | Cohorts |      |      |      |      |      |
|--------------|-------|------|---------|------|------|------|------|------|
|              |       |      | 2002    |      | 2006 |      | 2010 |      |
|              | n     | %    | n       | %    | n    | %    | n    | %    |
| Sex          |       |      |         |      |      |      |      |      |
| Boys         | 4067  | 47.9 | 1466    | 48.5 | 1261 | 49.3 | 1340 | 46.1 |
| Girls        | 4416  | 52.1 | 1557    | 51.5 | 1298 | 50.7 | 1564 | 53.9 |
| Age          |       |      |         |      |      |      |      |      |
| 11-13        | 4266  | 50.3 | 1746    | 57.8 | 1275 | 49.8 | 1245 | 42.9 |
| 15-17        | 4220  | 49.7 | 1277    | 42.2 | 1284 | 50.2 | 1659 | 57.1 |
| School grade |       |      |         |      |      |      |      |      |
| Sixth grade  | 4348  | 51.2 | 1809    | 59.8 | 1275 | 49.8 | 1264 | 43.5 |
| Tenth grade  | 4138  | 48.8 | 1214    | 40.2 | 1284 | 50.2 | 1640 | 56.5 |

Descriptive statistics and the differences among HBSC survey years for each age group and sex are presented in table 2.

1  
2  
3 For the boys aged 11-13, the number of times they reported practicing PA during the  
4 last 7 days was between  $4.2\pm 2.1$  to  $4.4\pm 2.1$  times. At the age of 15-17 they reported practicing  
5  $3.5\pm 1.9$  times a week in 2002,  $3.9\pm 1.9$  in 2006 and  $3.8\pm 1.9$  in 2010, with a significant  
6 increase from 2002 to 2006/2010 ( $p<0.05$ ). In both age groups the prevalence of PA over the  
7 last 6 months decreased slightly between 2006 and 2010, but decreased significantly between  
8 2006 and 2010 ( $p<0.05$  and  $p<0.01$ ). Soccer was the most practiced sports activity, but over  
9 the years there was a significant decline in the number of participants ( $p<0.001$  for both age-  
10 groups). On the other hand, gymnastics participation decreased from 2002 to 2006 and then  
11 increased from 2006 to 2010, reaching the higher value in 2010 for the ages of 11-13 ( $p<0.05$ )  
12 and 15-17 years ( $p<0.05$ ). The type of PA practiced changed over the years for the younger  
13 participants, decreasing the number of team sports participants and increasing participation in  
14 individual sports ( $p<0.01$ ). Boys, younger and older, preferred team sports activities more  
15 than individual activities. However, over the years, young boys participation in team sports  
16 decreased progressively from 2002 to 2010 ( $p<0.01$ ).

17  
18  
19  
20  
21  
22  
23  
24  
25  
26  
27  
28  
29  
30  
31  
32  
33  
34 Girls reported practicing PA between  $3.3\pm 1.9$  to  $3.5\pm 1.9$  at the age of 11-13, and  
35  $2.7\pm 1.9$  to  $2.9\pm 1.7$  at the age of 15-17. Soccer, gymnastics, and swimming were the most  
36 popular sports activities. Over the years, the number of soccer practitioners significantly  
37 decreased among younger girls ( $p<0.001$ ). For the older girls, the number of participants  
38 decreased significantly from 2002 to 2006 and then increased significantly from 2006 to 2010  
39 ( $p<0.001$ ). In respect to gymnastics, the number of participants decreased significantly from  
40 2002 to 2006/2010 for both younger ( $p<0.01$ ) and older girls ( $p<0.01$ ). The number of older  
41 girls that practiced volleyball was inconsistent, decreasing significantly from 2002 to 2006  
42 and increasing significantly again from 2006 to 2010 ( $p<0.05$ ). Girls aged 11-13, preferred  
43 individual sports activities rather than team sports activities over the years ( $p<0.05$ ). On the  
44  
45  
46  
47  
48  
49  
50  
51  
52  
53  
54  
55  
56  
57  
58  
59  
60



other hand, among older girls, participants in individual sports activities decreased significantly from 2006 to 2010 ( $p < 0.01$ ).

Table 2. Boys' and girls' physical activity participation in 2002, 2006 and 2010, according age group.

|                                           | 11-13 years     |                 |                 |          | 15-17 years     |                 |                 |                    |
|-------------------------------------------|-----------------|-----------------|-----------------|----------|-----------------|-----------------|-----------------|--------------------|
|                                           | 2002<br>(n=865) | 2006<br>(n=686) | 2010<br>(n=625) | <i>p</i> | 2002<br>(n=601) | 2006<br>(n=575) | 2010<br>(n=715) | <i>p</i>           |
| <b>Boys</b>                               |                 |                 |                 |          |                 |                 |                 |                    |
| PA in the last 7 days (M±SD) <sup>1</sup> | 4.2±2.1         | 4.4±2.1         | 4.3±2.1         | 0.243    | 3.5±1.9         | 3.9±1.9         | 3.8±1.9         | 0.019 <sup>a</sup> |
| PA in the last 6 month (%) <sup>2</sup>   |                 |                 |                 | 0.012    |                 |                 |                 | 0.001              |
| Did not practice PA                       | 5.4             | 5.5             | 9.0             |          | 11.1            | 12.9            | 18.0            |                    |
| Practiced PA                              | 94.6            | 94.5            | 91.0            |          | 88.9            | 87.1            | 82.0            |                    |
| Sports practiced (%) <sup>2</sup>         |                 |                 |                 |          |                 |                 |                 |                    |
| Soccer                                    | 72.6            | 69.8            | 60.8            | <0.001   | 57.1            | 50.1            | 44.3            | <0.001             |
| Basketball                                | 22.1            | 26.4            | 22.4            | 0.102    | 16.6            | 12.7            | 13.7            | 0.130              |
| Volleyball                                | 8.6             | 12.4            | 10.6            | 0.089    | 9.2             | 7.8             | 8.1             | 0.683              |
| Handball                                  | 9.7             | 11.8            | 11.2            | 0.388    | 8.3             | 7.1             | 7.0             | 0.619              |
| Swimming                                  | 18.0            | 15.3            | 17.3            | 0.352    | 15.8            | 13.6            | 15.5            | 0.500              |
| Athletics                                 | 12.7            | 13.8            | 13.1            | 0.806    | 8.2             | 7.7             | 9.2             | 0.575              |
| Gymnastics                                | 17.5            | 17.1            | 22.2            | 0.027    | 7.0             | 3.8             | 6.7             | 0.038              |
| Cycling                                   | 22.7            | 24.2            | 21.4            | 0.490    | 18.5            | 16.7            | 14.7            | 0.181              |
| Type of sport activity <sup>2</sup>       |                 |                 |                 | 0.008    |                 |                 |                 | 0.524              |
| Individual                                | 8.7             | 8.3             | 13.0            |          | 13.3            | 13.6            | 13.4            |                    |
| Team                                      | 40.9            | 38.2            | 33.8            |          | 41.3            | 38.4            | 33.0            |                    |
| Individual and collective                 | 38.5            | 37.8            | 34.9            |          | 24.6            | 19.7            | 19.7            |                    |
| <b>Girls</b>                              |                 |                 |                 |          |                 |                 |                 |                    |
| PA in the last 7 days (M±SD) <sup>1</sup> | 3.5±1.9         | 3.3±1.9         | 3.4±1.9         | 0.456    | 2.7±1.9         | 2.7±1.7         | 2.9±1.7         | 0.056              |
| PA in the last 6 month (%) <sup>2</sup>   |                 |                 |                 | 0.491    |                 |                 |                 | 0.745              |
| Did not practice PA                       | 15.7            | 13.4            | 14.8            |          | 31.8            | 30.7            | 32.5            |                    |
| Practiced PA                              | 84.3            | 86.6            | 85.2            |          | 68.2            | 69.3            | 67.5            |                    |
| Sports practiced (%) <sup>2</sup>         |                 |                 |                 |          |                 |                 |                 |                    |
| Soccer                                    | 35.3            | 31.4            | 25.8            | <0.001   | 15.7            | 9.7             | 16.7            | <0.001             |
| Basketball                                | 17.8            | 16.6            | 18.7            | 0.640    | 9.3             | 7.2             | 9.6             | 0.189              |
| Volleyball                                | 14.0            | 11.0            | 10.3            | 0.069    | 13.6            | 9.7             | 14.5            | 0.012              |
| Handball                                  | 6.1             | 6.3             | 8.4             | 0.191    | 2.7             | 3.8             | 5.8             | 0.006              |
| Swim                                      | 25.0            | 21.2            | 21.0            | 0.112    | 13.5            | 14.8            | 13.9            | 0.757              |
| Athletics                                 | 12.4            | 11.0            | 13.7            | 0.370    | 5.8             | 5.4             | 7.5             | 0.155              |
| Gymnastics                                | 36.1            | 28.4            | 29.4            | 0.002    | 15.4            | 10.4            | 9.5             | 0.001              |
| Cycling                                   | 12.8            | 10.7            | 10.0            | 0.195    | 6.2             | 6.1             | 6.1             | 0.993              |
| Type of sport activity <sup>2</sup>       |                 |                 |                 | 0.015    |                 |                 |                 | 0.002              |
| Individual                                | 28.0            | 26.8            | 28.4            |          | 21.2            | 21.6            | 16.3            |                    |
| Team                                      | 17.0            | 21.1            | 14.7            |          | 19.2            | 13.7            | 18.8            |                    |
| Individual and collective                 | 30.0            | 23.2            | 25.0            |          | 11.4            | 8.5             | 12.0            |                    |

PA, physical activity

<sup>1</sup> Tested by ANOVA.

<sup>2</sup> Tested by Chi Square.

<sup>a</sup> Data from 2002 is statically different from 2006 and 2010. Tested by Tukey's HSD.

Table 3 presents PA information from 2 different cohorts, 4 years apart. Among boys, PA practices during the last 7 days decreased from  $4.2 \pm 2.1$  to  $3.9 \pm 1.9$  between 2002 and 2006 ( $p < 0.001$ ) and decreased  $4.4 \pm 2.1$  to  $3.8 \pm 1.9$  between 2006 and 2010 ( $p < 0.001$ ). The prevalence of PA practiced over the last 6 months also declined significantly in both cohorts ( $p < 0.001$ ). Looking at the different sports activities, the number of practitioners decreased over the years in almost all activities. It is noteworthy that only volleyball from 2002 to 2006 and swimming from 2006 to 2010 remained relatively stable. In both cohorts, as age increased the number of participants of team sports activities declined, and, in contrast, participants of individual activities significantly increased ( $p < 0.001$ ).

Among girls, PA practices during the last 7 days declined significantly from  $3.5 \pm 1.9$  to  $2.7 \pm 1.7$  between 2002 and 2006 ( $p < 0.001$ ), and from  $3.3 \pm 1.9$  to  $2.9 \pm 1.7$  between 2006 and 2010 ( $p < 0.001$ ). Similar to what was observed among boys, the prevalence of PA over the last 6 months decreased in both cohorts ( $p < 0.001$ ). The practice of PA decreased significantly in all sports activities from 2002 to 2006. Data from 2006 and 2010 shows that the practice of PA also declined, with the exception of handball which remained stable and volleyball which, in contrast to other sports, had a marginally significant increase ( $p = 0.052$ ). Girls team and individual sports participation decreased between 2002 and 2006 ( $p < 0.001$ ) and between 2006 and 2010 ( $p < 0.01$ ).

Table 3. Boys' and girls' physical activity participation over the years.

| Boys                                      | 2002                   | 2006                   | <i>p</i> | 2006                   | 2010                   | <i>p</i> |
|-------------------------------------------|------------------------|------------------------|----------|------------------------|------------------------|----------|
|                                           | 11-13 years<br>(n=865) | 15-17 years<br>(n=575) |          | 11-13 years<br>(n=686) | 15-17 years<br>(n=715) |          |
| PA in the last 7 days (M±SD) <sup>1</sup> | 4.2±2.1                | 3.9±1.9                | 0.001    | 4.4±2.1                | 3.8±1.9                | <0.001   |
| PA in the last 6 months (%) <sup>2</sup>  |                        |                        | <0.001   |                        |                        | <0.001   |
| Did not practice PA                       | 5.4                    | 12.6                   |          | 5.5                    | 18.0                   |          |
| Practiced PA                              | 94.6                   | 87.4                   |          | 94.5                   | 82.0                   |          |
| Sports practiced (%) <sup>2</sup>         |                        |                        |          |                        |                        |          |
| Soccer                                    | 72.6                   | 51.1                   | <0.001   | 69.8                   | 45.1                   | <0.001   |
| Basketball                                | 22.1                   | 13.9                   | <0.001   | 26.4                   | 14.0                   | <0.001   |
| Volleyball                                | 8.6                    | 8.6                    | 0.082    | 12.4                   | 9.1                    | 0.010    |
| Handball                                  | 9.7                    | 6.9                    | 0.104    | 11.8                   | 7.2                    | 0.002    |

|                                     |      |      |        |      |      |        |
|-------------------------------------|------|------|--------|------|------|--------|
| Swimming                            | 18.0 | 13.6 | 0.029  | 15.3 | 15.2 | 0.941  |
| Athletics                           | 12.7 | 7.8  | 0.002  | 13.8 | 9.3  | 0.007  |
| Gymnastics                          | 17.5 | 4.7  | <0.001 | 17.1 | 7.1  | <0.001 |
| Cycling                             | 22.7 | 17.0 | 0.006  | 24.2 | 14.8 | <0.001 |
| Type of sport activity <sup>2</sup> |      |      | <0.001 |      |      | <0.001 |
| Individual                          | 8.7  | 13.6 |        | 8.3  | 13.4 |        |
| Team                                | 40.9 | 38.4 |        | 38.2 | 33.0 |        |
| Individual and collective           | 38.5 | 19.7 |        | 37.8 | 19.7 |        |

|                                           | 2002        | 2006        |        | 2006        | 2010        |        |
|-------------------------------------------|-------------|-------------|--------|-------------|-------------|--------|
|                                           | 11-13 years | 15-17 years |        | 11-13 years | 15-17 years |        |
| Girls                                     | (n=881)     | (n=709)     | p      | (n=589)     | (n=944)     | p      |
| PA in the last 7 days (M±SD) <sup>1</sup> | 3.5±1.9     | 2.7±1.7     | <0.001 | 3.3±1.9     | 2.9±1.7     | <0.001 |
| PA in the last 6 month (%) <sup>2</sup>   |             |             | <0.001 |             |             | <0.001 |
| Did not practice PA                       | 15.7        | 30.1        |        | 13.4        | 32.1        |        |
| Practiced PA                              | 84.3        | 69.9        |        | 86.6        | 67.9        |        |
| Sports practiced (%) <sup>2</sup>         |             |             |        |             |             |        |
| Soccer                                    | 35.3        | 11.1        | <0.001 | 31.4        | 16.6        | <0.001 |
| Basketball                                | 17.8        | 7.5         | <0.001 | 16.6        | 9.7         | <0.001 |
| Volleyball                                | 14.0        | 10.0        | 0.011  | 11.0        | 14.5        | 0.052  |
| Handball                                  | 6.1         | 3.7         | 0.039  | 6.3         | 5.9         | 0.741  |
| Swimming                                  | 25.0        | 14.8        | <0.001 | 21.2        | 13.7        | <0.001 |
| Athletics                                 | 12.4        | 5.2         | <0.001 | 11.0        | 7.4         | 0.021  |
| Gymnastics                                | 36.1        | 11.1        | <0.001 | 28.4        | 10.0        | <0.001 |
| Cycling                                   | 12.8        | 6.1         | <0.001 | 10.7        | 6.1         | 0.002  |
| Type of sport activity <sup>2</sup>       |             |             | <0.001 |             |             | 0.004  |
| Individual                                | 28.0        | 21.6        |        | 26.8        | 16.3        |        |
| Team                                      | 17.0        | 13.7        |        | 21.1        | 18.8        |        |
| Individual and collective                 | 30.0        | 8.5         |        | 23.2        | 12.0        |        |

<sup>1</sup> Tested by t Test.

<sup>2</sup> Tested by Chi Square.

## DISCUSSION

This is the first study among Portuguese adolescents to explore the PA practices of different cohorts, collecting data through the same standard protocol. The goal of the study was, using three-cohort of representative samples of Portuguese adolescents, to investigate the prevalence of PA among Portuguese adolescents, and understand how it changed between 2002 and 2010. Overall, the study points to age as a factor related to diminished PA participation. The study also revealed that the prevalence of PA has decreased over the years for the same age groups.

Younger and older adolescents reported practicing PA less than 7 times a week. Although it was not assessed the duration and intensity of PA, results indicated that adolescents do not get enough practiced to meet the recommended levels of 60 minutes of

1  
2  
3 moderate to vigorous PA each day.[5] This is in line with other recent studies among  
4  
5 Portuguese people that described the prevalence of PA.[8, 9] Because our data is from  
6  
7 different HBSC waves, it was possible to observe the evolution of PA in each age group over  
8  
9 the 2002-2010 time frames. With the exception of boys aged 15-17, there were no significant  
10  
11 changes over the years in regard to PA practiced during the last 7 days. Moreover, there was a  
12  
13 decrease in the prevalence of PA over the last 6 months, especially among boys. These results  
14  
15 can be interpreted in several different ways. First, strategies to increase the number of times  
16  
17 that adolescents practice PA have not been successful. Second, adolescents and adults may  
18  
19 not be aware of the recommended levels of PA for young people. Consequently they might  
20  
21 assume that they are active enough and therefore may conclude that there is no need to be  
22  
23 more physically active.[16] Third, schools, even though called to give greater attention to  
24  
25 provision of PA for students,[17] seem to have failed at promoting PA. Results indicate that  
26  
27 there has been no progress made toward attaining this goal.  
28  
29  
30

31  
32 Adolescent behavior, such as PA and inactivity over the years, is an issue rarely  
33  
34 studied in Portugal. This type of study is important and should be of interest on a national and  
35  
36 international level because it helps policy makers, educators and health professionals to  
37  
38 understand young people's health in their social context and tracks changes as they develop  
39  
40 over the years. Therefore, with data from successive surveys, trends can be identified making  
41  
42 it possible to evaluate more accurately the impact of programs and strategies implemented in  
43  
44 order to promote PA and reduce sedentary behavior among adolescents. While the HBSC  
45  
46 conducts national[10-12] and international systematic surveys,[6, 13] in the United States of  
47  
48 America, the Center for Disease Control and Prevention also conducts a periodic survey of  
49  
50 adolescent health risk and health protective behaviors.[18] This shows the importance of  
51  
52 studying and tracking adolescent behavior and allows cross-national comparisons.  
53  
54  
55  
56  
57  
58  
59  
60

1  
2  
3 The trend of PA declining with age was significant among boys and girls in the two  
4 different cohorts of adolescents (2002 to 2006 and 2006 to 2010). These results are similar to  
5 those found in others studies with adolescents from Portugal[19] and other countries.[6, 7] In  
6 Europe, the inverse relationship between PA and age is common in most countries.[6]  
7  
8 Riddoch et al.[20], in what is considered the first study to objectively measure physical  
9 activity with a representative sample of European children, verified that 9 year old children  
10 were considerably more active than 15 year old adolescents, presenting similar results in all  
11 countries. Virtually all 9 year old children practiced the recommended amount of PA, or more  
12 than recommended, while only a small percentage of 15 year olds did so. This indicated that  
13 as age increased PA decreased.  
14  
15  
16  
17  
18  
19  
20  
21  
22  
23  
24

25 The decline of PA with age has triggered much discussion in the scientific community.  
26 Sallis[21] analyzed various studies related to the decline of PA, and concluded that the ages  
27 between 13 and 18 are at risk. Having also observed the decline in animals, the author was  
28 lead to suppose that the decline had a biological origin. The consistency of the results of the  
29 Riddoch et al.[20] among adolescents from different countries is in some way congruent with  
30 Sallis'[21] assumptions, allowing one to conclude that children's and adolescents' PA is  
31 probably determined biologically. However, although the effect of age is significant on PA, it  
32 sometimes only explained 1% of the variability[22] which means that the decline in PA with  
33 age could be related to other factors such as the great academic pressure adolescents are  
34 under,[23] longer time in sedentary activities such as screen time [24], and having part-time  
35 jobs to earn some money.[25] Therefore, qualitative studies to understand clearly the reasons  
36 for the decrease in PA among adolescents are needed.  
37  
38  
39  
40  
41  
42  
43  
44  
45  
46  
47  
48  
49  
50

51 Soccer was the most practiced sports activity among boys and older girls over the  
52 years and at different ages. This is understandable since it is the most popular sports activity  
53 in Portugal and it is the activity with the most participants.[26, 27] Nevertheless, the number  
54  
55  
56  
57  
58  
59  
60

1  
2  
3 of participants decreased over the years within both age-groups. As the number of participants  
4  
5 in others sports activities did not increase significantly, this suggests that the decrease of  
6  
7 soccer participants might be related to the prevalence of adolescents who did not practice PA  
8  
9 over the last 6 month. This shows the importance of soccer as a sports activity among  
10  
11 Portuguese adolescents. Thus, when considering an intervention aimed to increase PA, soccer  
12  
13 should be considered as an activity that attracts adolescents.  
14

15  
16 The type of activity practiced by boys has the tendency to change over the years.  
17  
18 While the number of team sports participants decreased between 11-13 and 15-17 years,  
19  
20 participation in individual sports increased. On the other hand, for the girls, participation in  
21  
22 both individual and team sports decreased with age. The reason for the choice of individual or  
23  
24 team sports may be related to social factors, and some could argue that team sports would be  
25  
26 better for the development of social skills. However, studies have shown that there is no  
27  
28 difference in social self-esteem between participants in individual or team sports.[28, 29] For  
29  
30 the older boys the increased participation in individual sports may be related to their level of  
31  
32 autonomy.  
33  
34

35  
36 The present study had some limitations. Measurements of PA were based on self-  
37  
38 report. Self-report generally has limited reliability and validity.[30] So, the use of accurate  
39  
40 objective measures is preferable, but it is not often feasible in epidemiological studies with  
41  
42 large samples. Moreover, the intensity and duration of PA sessions were not measured. These  
43  
44 evaluations would be useful in determining the prevalence of adolescents who attained  
45  
46 recommended levels of PA.  
47  
48

49  
50 There are also several strengths in the present study. First, data from a representative  
51  
52 sample was collected. Second, data from three different cohorts was collected (2002, 2006  
53  
54 and 2010), using a standard protocol, which allows for comparisons and for understanding of  
55  
56 the differences of PA over the years in two different age groups of boys and girls.  
57  
58

## CONCLUSION

The prevalence of physical inactivity increased significantly among boys between ages 11-13 and 15-17, but not in girls. The number of times adolescents practiced PA during the last 7 days remained relatively stable, which means that the campaigns and attempts to increase PA among adolescents have not been very successful. With age, there was a significant decrease in most sports activities among boys and girls. This indicated that as adolescents are getting older they may have different interests leading some to stop practicing PA. These findings imply that it is important to more effectively promote PA among adolescents, using different strategies based on age and sex.

### **Acknowledgments**

The authors thank the adolescents for their participation in the study. We also thank Joyce Voelker for revising the document.

### **Funding**

The HBSC study in Portugal was funded by public funds: Ministry of Health and Ministry of Education and Science.

### **Contributorship Statement**

AM and MGM contributed in conception and design. MGM contributed in acquisition of the data. AM and MGM contributed in analysis and interpretation of the data. AM contributed to the drafting of the manuscript. AM and MGM contributed to the revisions of the manuscript and the interpretation of the findings.

### **Competing interests**

The authors declare that they have no competing interests.

### **Data Sharing Statement**

No additional data available.



## REFERENCES

1. Janssen I, Leblanc AG. Systematic review of the health benefits of physical activity and fitness in school-aged children and youth. *Int J Behav Nutr Phys Act* 2010;7:40.
2. Allender S, Kremer P, de Silva-Sanigorski A, Lacy K, Millar L, Mathews L, et al. Associations between activity-related behaviours and standardized BMI among Australian adolescents. *J Sci Med Sport* 2011;14:512-21.
3. Santos MP, Oliveira J, Ribeiro JC, Mota J. Active travel to school, BMI and participation in organised and non-organised physical activity among Portuguese adolescents. *Prev Med* 2009;49:497-9.
4. Telama R, Yang X, Viikari J, Valimaki I, Wanne O, Raitakari O. Physical activity from childhood to adulthood: a 21-year tracking study. *Am J Prev Med* 2005;28:267-73.
5. WHO. Global recommendations on physical activity for health. Geneva, Suíça: World Health Organization; 2010.
6. Currie C, Zanotti C, Morgan A, Currie D, de Looze M, Roberts C, et al. Social determinants of health and well-being among young people. Health Behaviour in School-aged Children (HBSC) study: International Report From the 2009/2010 survey. Copenhagen: WHO Regional Office for Europe; 2012.
7. Hallal PC, Andersen LB, Bull FC, Guthold R, Haskell W, Ekelund U. Global physical activity levels: surveillance progress, pitfalls, and prospects. *Lancet* 2012;380:247-57.
8. Baptista F, Santos DA, Silva AM, Mota J, Santos R, Vale S, et al. Prevalence of the Portuguese population attaining sufficient physical activity. *Med Sci Sports Exerc* 2012;44:466-73.
9. Marques A, Carreiro da Costa F. Levels of physical activity of urban adolescents according to age and gender. *Int J Sports Sci* 2013;3:23-7.

- 1  
2  
3 10. Matos MG, Equipa Aventura Social. A saúde dos adolescentes portugueses (Quatro  
4 anos depois) [The health of Portuguese adolescents (Four years later)]. Lisboa: Edições FMH;  
5 2003.  
6  
7
- 8  
9 11. Matos MG, Equipa Aventura Social. A Saúde dos Adolescentes Portugueses - Hoje e  
10 em 8 anos - Relatório Preliminar do Estudo HBSC 2006 [The Portuguese Adolescent Health  
11 - Today and in eight years - Preliminary Report of the HBSC study in 2006]. Cruz Quebrada:  
12 Faculdade de Motricidade Humana; 2006.  
13  
14
- 15 12. Matos MG, Simões C, Tomé G, Camacho I, Ferreira M, L. R, et al. Aventura social &  
16 saúde. A saúde dos adolescentes portugueses. Relatório do estudo HBSC 2010 [Social  
17 adventure & Health. The health of Portuguese adolescents. Report of the 2010 HBSC study].  
18 Cruz-Quebrada: Faculdade de Motricidade Humana; 2011.  
19  
20
- 21 13. Currie C, Hurrelmann K, Settertobulte W, Smith R, Todd J. Health and health  
22 behavior among young people. Health Behaviour in School-aged Children: a WHO cross-  
23 national study (HBSC). Copenhagen: World Health Organization; 2000.  
24  
25
- 26 14. Caspersen CJ, Powell KE, Christenson GM. Physical activity, exercise, and physical  
27 fitness: definitions and distinctions for health-related research. Public Health Rep  
28 1985;100:126-31.  
29  
30
- 31 15. Sallis JF, Buono MJ, Roby JJ, Micale FG, Nelson JA. Seven-day recall and other  
32 physical activity self-reports in children and adolescents. Med Sci Sports Exerc 1993;25:99-  
33 108.  
34  
35
- 36 16. Marques A, Martins J, Ramos M, Yazigi F, Carreiro da Costa F. Perception and reality  
37 - Portuguese adults' awareness of active lifestyle. Eur J Sport Sci 2013;14:468-74.  
38  
39
- 40 17. Pate RR, Davis MG, Robinson TN, Stone EJ, McKenzie TL, Young JC. Promoting  
41 physical activity in children and youth: a leadership role for schools: a scientific statement  
42 from the American Heart Association Council on Nutrition, Physical Activity, and  
43  
44  
45  
46  
47  
48  
49  
50  
51  
52  
53  
54  
55  
56  
57  
58  
59  
60

1  
2  
3 Metabolism (Physical Activity Committee) in collaboration with the Councils on  
4  
5 Cardiovascular Disease in the Young and Cardiovascular Nursing. *Circulation*  
6  
7 2006;114:1214-24.  
8

9  
10 18. Brener ND, Kann L, Shanklin S, Kinchen S, Eaton DK, Hawkins J, et al. Methodology  
11  
12 of the Youth Risk Behavior Surveillance System--2013. *MMWR - Recommendations and*  
13  
14 *Reports* 2013;62:1-20.  
15

16  
17 19. Seabra AFTE, Ribeiro Maia JA, Mendonca DM, Thomis M, Caspersen CJ, Fulton JE.  
18  
19 Age and sex differences in physical activity of Portuguese adolescents. *Med Sci Sports Exerc*  
20  
21 2008;40:65-70.  
22

23  
24 20. Riddoch CJ, Bo Andersen L, Wedderkopp N, Harro M, Klasson-Heggebo L, Sardinha  
25  
26 LB, et al. Physical activity levels and patterns of 9- and 15-yr-old European children. *Med Sci*  
27  
28 *Sports Exerc* 2004;36:86-92.  
29

30  
31 21. Sallis JF. Age-related decline in physical activity: a synthesis of human and animal  
32  
33 studies. *Med Sci Sports Exerc* 2000;32:1598-600.  
34

35  
36 22. Cantera-Garde M, Devís-Devís J. Physical activity levels of secondary school Spanish  
37  
38 adolescents. *Eur J Phys Educ* 2000;5:28-44.  
39

40  
41 23. Lee KS, Trost SG. Physical activity patterns of Singaporean adolescents. *Pediatr Exerc*  
42  
43 *Sci* 2006;18:400-14.  
44

45  
46 24. Sharif I, Sargent JD. Association between television, movie, and video game exposure  
47  
48 and school performance. *Pediatrics* 2006;118:E1061-E70.  
49

50  
51 25. Malina R, Bouchard C, Bar-Or O. Risk factors during growth and adult health. In:  
52  
53 Malina R, Bouchard C, Bar-Or O, editors. *Growth, maturation, and physical activity*.  
54  
55 Champaign: Human Kinetics; 2004. p. 587-608.  
56

57  
58 26. Costa V, Serôdio-Fernandes A, Maia M. Hábitos desportivos dos jovens do interior  
59  
60 norte e litoral norte de Portugal. *Rev Port Ciênc Desporto* 2009;9:46-55.

- 1  
2  
3 27. Marivoet S. Hábitos desportivos da população portuguesa. Lisboa: Ministério da  
4 Juventude e do Desporto. Instituto Nacional de Formação e Estudos do Desporto; 2001.  
5  
6  
7 28. Dinc Z. Social Self-Efficacy of Adolescents Who Participate in Individual and Team  
8 Sports. Soc Behav Personal 2011;39:1417-23.  
9  
10  
11 29. Wann DL, Lingle SE. Comparison of Team and Individual Sports Participants  
12 Tendencies to Join Groups. Percept Motor Skill 1994;79:833-4.  
13  
14  
15 30. Shephard RJ. Limits to the measurement of habitual physical activity by  
16 questionnaires. Brit J Sport Med 2003;37:197-206.  
17  
18  
19  
20  
21  
22  
23  
24  
25  
26  
27  
28  
29  
30  
31  
32  
33  
34  
35  
36  
37  
38  
39  
40  
41  
42  
43  
44  
45  
46  
47  
48  
49  
50  
51  
52  
53  
54  
55  
56  
57  
58  
59  
60

## Research checklists

|                              | Item No | Recommendation                                                                                                                                                                                |
|------------------------------|---------|-----------------------------------------------------------------------------------------------------------------------------------------------------------------------------------------------|
| <b>Title and abstract</b>    | 1       | Indicate the study's design with a commonly used term in the title or the abstract.<br>Provide in the abstract an informative and balanced summary of what was done and what was found.       |
| <b>Introduction</b>          |         |                                                                                                                                                                                               |
| Background/rationale         | 2       | Explain the scientific background and rationale for the investigation being reported.                                                                                                         |
| Objectives                   | 3       | State specific objectives.                                                                                                                                                                    |
| <b>Methods</b>               |         |                                                                                                                                                                                               |
| Study design                 | 4       | Present key elements of study design early in the paper                                                                                                                                       |
| Setting                      | 5       | Describe the setting, locations, and relevant dates, including periods of recruitment, exposure, follow-up, and data collection                                                               |
| Participants                 | 6       | Give the sources and methods of selection of participants.                                                                                                                                    |
| Variables                    | 7       | Clearly define all outcomes, exposures, predictors, potential confounders, and effect modifiers.                                                                                              |
| Data sources/<br>measurement | 8       | For each variable of interest, give sources of data and details of methods of assessment (measurement).                                                                                       |
| Bias                         | 9       | Describe any efforts to address potential sources of bias                                                                                                                                     |
| Quantitative variables       | 10      | Explain how quantitative variables were handled in the analyses.                                                                                                                              |
| Statistical methods          | 11      | Describe all statistical methods                                                                                                                                                              |
| <b>Results</b>               |         |                                                                                                                                                                                               |
| Participants                 | 12      | Report numbers of individuals at each stage of study.                                                                                                                                         |
| Descriptive data             | 13      | Give characteristics of study participants.                                                                                                                                                   |
| Outcome data                 | 14      | Report numbers of outcome events or summary measures over time                                                                                                                                |
| Main results                 | 15      | Give estimates and, if applicable, confounder-adjusted estimates and their precision (eg, 95% confidence interval). Make clear which confounders were adjusted for and why they were included |
| Other analyses               | 16      | Report other analyses done—eg analyses of subgroups and interactions, and sensitivity analyses                                                                                                |
| <b>Discussion</b>            |         |                                                                                                                                                                                               |
| Key results                  | 17      | Summarise key results with reference to study objectives.                                                                                                                                     |
| Limitations                  | 18      | Discuss limitations of the study, taking into account sources of potential bias or imprecision. Discuss both direction and magnitude of any potential bias.                                   |
| Interpretation               | 19      | Give a cautious overall interpretation of results considering objectives, limitations, multiplicity of analyses, results from similar studies, and other relevant evidence.                   |
| Generalisability             | 20      | Discuss the generalisability of the study results.                                                                                                                                            |
| <b>Other information</b>     |         |                                                                                                                                                                                               |
| Funding                      | 21      | Give the source of funding and the role of the funders for the present study and, if applicable, for the original study on which the present article is based                                 |

# BMJ Open

## Adolescents' physical activity trends over the years. A three-cohort study based on the Health Behaviour in School-aged Children (HBSC) Portuguese survey

|                                 |                                                                                                                                                                                                                                                                                                         |
|---------------------------------|---------------------------------------------------------------------------------------------------------------------------------------------------------------------------------------------------------------------------------------------------------------------------------------------------------|
| Journal:                        | <i>BMJ Open</i>                                                                                                                                                                                                                                                                                         |
| Manuscript ID:                  | bmjopen-2014-006012.R1                                                                                                                                                                                                                                                                                  |
| Article Type:                   | Research                                                                                                                                                                                                                                                                                                |
| Date Submitted by the Author:   | 28-Jul-2014                                                                                                                                                                                                                                                                                             |
| Complete List of Authors:       | Marques, Adilson; Centro Interdisciplinar de Estudo da Performance Humana, Faculdade de Motricidade Humana, Universidade de Lisboa, ; Projeto Aventura Social, Gaspar de Matos, Margarida; Centro de Malária e Outras Doenças Tropicais (CMDT), Universidade Nova de Lisboa, ; Projeto Aventura Social, |
| <b>Primary Subject Heading</b>: | Epidemiology                                                                                                                                                                                                                                                                                            |
| Secondary Subject Heading:      | Sports and exercise medicine                                                                                                                                                                                                                                                                            |
| Keywords:                       | EPIDEMIOLOGY, PREVENTIVE MEDICINE, SPORTS MEDICINE                                                                                                                                                                                                                                                      |
|                                 |                                                                                                                                                                                                                                                                                                         |

SCHOLARONE™  
Manuscripts

## Title page

Adolescents' physical activity trends over the years. A three-cohort study based on the Health Behaviour in School-aged Children (HBSC) Portuguese survey

Adilson Marques<sup>1,2</sup>, Margarida Gaspar de Matos<sup>2,3</sup>

<sup>1</sup> Projeto Aventura Social, Lisboa, Portugal

<sup>2</sup> Centro Interdisciplinar de Estudo da Performance Humana, Faculdade de Motricidade Humana, Faculdade de Motricidade Humana, Universidade de Lisboa

<sup>3</sup> Centro de Malária e Outras Doenças Tropicais (CMDT), Lisboa, Portugal

Corresponding author: Adilson Marques, CIPER, Faculdade de Motricidade Humana, Universidade de Lisboa, Estrada da Costa, 1499-002, Cruz Quebrada, Dafundo, Portuga.

Telephone: (00351) 214149100, E-mail: amarques@fmh.ulisboa.pt

Keywords: epidemiology; preventive medicine, sports medicine

Word count for body text: 2570 words

## Abstract

**Objective:** Many young people do not practice enough physical activity (PA) to benefit their health. The study aimed to investigate the prevalence of PA and understand the trends between 2002 and 2010, using three-cohort of representative samples of Portuguese adolescents.

**Design, setting and participants:** Participants were 8483 adolescents (4067 boys, 4416 girls), that participated in the Health Behavior in School-aged Children Portuguese survey in 2002, 2006 and 2010.

**Design, setting and participants:** A questionnaire was used to collected data of physical activity. Analyses were run separately for boys and girls.

**Results:** For the boys, at the age of 15-17 they reported practicing  $3.5 \pm 1.9$  times a week in 2002,  $3.9 \pm 1.9$  in 2006 and  $3.8 \pm 1.9$  in 2010, with a significant increase from 2002 to 2006/2010 ( $p < 0.05$ ). PA practice during the last 7 days decreased from  $4.2 \pm 2.1$  to  $3.9 \pm 1.9$  between 2002 and 2006 ( $p < 0.001$ ) and decreased  $4.4 \pm 2.1$  to  $3.8 \pm 1.9$  between 2006 and 2010 ( $p < 0.001$ ). Among girls, PA practices during the last 7 days declined significantly from  $3.5 \pm 1.9$  to  $2.7 \pm 1.7$  between 2002 and 2006 ( $p < 0.001$ ), and from  $3.3 \pm 1.9$  to  $2.9 \pm 1.7$  between 2006 and 2010 ( $p < 0.001$ ).

**Conclusions:** The study points to age as a factor related to diminished PA participation. The study also revealed that the prevalence of PA has decreased over the years for the same age groups.



### Strengths and limitations of this study

– Data from a representative sample was collected from three different cohorts (2002, 2006 and 2010), using a standard protocol, which allows for comparisons and for understanding of the differences of PA over the years in two different age groups of boys and girls.

– Measurements of PA were based on self-report. Self-report generally has limited reliability and validity. So, the use of accurate objective measures is preferable, but it is not often feasible in epidemiological studies with large samples.

– Boys and girls do not practice enough physical activity to meet the recommended levels of 60 minutes in moderate to vigorous intensity on all or most days of the week. From a public health perspective there is a need to augment the time spent on physical activity.

– Soccer is the most practiced sports activity among boys and older girls. Thus, when considering an intervention aimed to increase PA, soccer should be considered as an activity that attracts adolescents.

## INTRODUCTION

1  
2  
3  
4  
5  
6  
7  
8  
9  
10  
11  
12  
13  
14  
15  
16  
17  
18  
19  
20  
21  
22  
23  
24  
25  
26  
27  
28  
29  
30  
31  
32  
33  
34  
35  
36  
37  
38  
39  
40  
41  
42  
43  
44  
45  
46  
47  
48  
49  
50  
51  
52  
53  
54  
55  
56  
57  
58  
59  
60

Young people's participation in physical activity (PA) is associated with health benefits, specifically improved bone mineral density, aerobic fitness, muscular strength, endurance, cardiovascular risk factor and mental health.[1] There is also a negative relationship between PA and careless nutrition, overweight and obesity among young people.[2, 3] Additionally, PA incorporated as a personal habit at a young age may persist into adulthood.[4] Thus, current guidelines from the World Health Organization (WHO) recommend that young people should engage in at least 60 minutes of PA in moderate to vigorous (MVPA) intensity on all or most days of the week.[5]

In spite of the health benefits, data suggests that many young people are not engaging in PA of sufficient length and intensity to benefit their health.[6, 7] The Portuguese figures are quite dramatic, revealing that only 36% of children aged 10-11 and 4% of adolescents aged 16-17 were considered sufficiently active.[8] Besides the lower levels of PA, the prevalence of active children and adolescents tended to decrease with age, particularly among girls.

In order to intervene and reverse this situation, it is important to understand the trends of PA over the years as well as the PA practices of adolescents. Nonetheless, because most adolescents do not commute actively to school, do not spend much time on PA and spend excessive time in sedentary behaviours[9], it is important to highlight sport participation. Studies have shown that sport participation contributes to adolescent attained PA guidelines,[10] and there is evidence that adolescents who participated in sports are more persistent exercisers than non-participants[11]. Most studies related to PA and sports participation are cross sectional[8, 9, 12] and results can only be interpreted in the light of the period in which they were collected. Since little is known about the PA and sport participation of adolescents and how they have evolved over the years, studies that allow researchers to

1  
2  
3 compare patterns and practices of PA and sport participation are needed. Therefore, the  
4  
5 present study, using three-cohort of representative samples of Portuguese adolescents, aimed  
6  
7 to investigate the prevalence of PA and sport participation among Portuguese adolescents and  
8  
9 understand how it has changed between 2002 and 2010.  
10

## 11 12 13 14 **METHODS**

### 15 16 **Participants**

17  
18 A proportionate nationally representative sample of 8483 adolescents (4067 boys,  
19  
20 4416 girls), randomly selected from grades 6 and 10 participated in the Health Behaviour in  
21  
22 School-aged Children (HBSC) Portuguese survey in 2002 (n=3023), 2006 (n=2556), and  
23  
24 2010 (n=2904).[13-15] HBSC Portugal is one of 43 countries and regions across Europe and  
25  
26 North America that make up the HBSC Network. HBSC collects data every four years on  
27  
28 children's and adolescent's health and well-being, social environments and health behaviors.  
29  
30 Data is used at a national and international level to add new vision into young people's health  
31  
32 and well-being, understand the social and psychological determinants of health, and  
33  
34 incorporate policies to improve young people's lives. The methodological aspects of the  
35  
36 HBSC study are well developed and published internationally.[16] The study received  
37  
38 approval from the Ethical Committee of Porto Medical School and the Portuguese National  
39  
40 Data Protection System. All school administrators gave their consent, legal guardians gave  
41  
42 written informed consent, and students provided assent.  
43  
44  
45  
46

### 47 48 **Measures**

49  
50 For data collection was used a questionnaire that was designed by the international  
51  
52 HBSC members and is described in detail elsewhere.[16, 17] To assess PA, adolescents were  
53  
54 provided with a common definition of PA,[18] and then were asked "How many days did you  
55  
56 practice PA during the last 7 days?" Answers were given on an 8-point scale (1 = none to 8 =  
57  
58  
59  
60

1  
2  
3 daily). Seven days of PA recall is shown to be reliable and valid for use in research on PA in  
4  
5 adolescents.[19] Adolescents were also asked if they practiced regular PA during the last 6  
6  
7 months. Answers were yes ( $\geq 3$  times a weeks) or no ( $<3$  times a week). The item has a high  
8  
9 reliability, with intraclass correlation coefficients (one-week interval) of 0.95. Adolescents  
10  
11 were then asked about the sports activity they usually practiced in organized or non-organized  
12  
13 contexts.  
14

### 15 16 **Procedures**

17  
18 Questionnaires were administered in schools in January 2002, 2006 and 2010, and  
19  
20 were answered anonymously. Participation in the study was voluntary. The administration of  
21  
22 the surveys was conducted according to standard guidelines from the HBSC survey  
23  
24 protocol[16] and it was carried out by trained school teachers during class time.  
25  
26

### 27 28 **Analysis**

29  
30 Adolescents were grouped into two age groups (11-13 and 15-17). Descriptive  
31  
32 statistics were calculated for all variables (means, standard deviation and percentages) for the  
33  
34 entire sample and according to HBSC survey years (2002, 2006, and 2010), age group, and  
35  
36 sex. ANOVA and chi-square were used to assess the differences among HBSC survey years  
37  
38 in each age group. Independent t-tests and chi-square were used to compare adolescents from  
39  
40 different cohorts. All statistical analyses were performed using IBM SPSS Statistics 20.0. The  
41  
42 level of significance was set at 0.05.  
43  
44  
45  
46

## 47 48 **RESULTS**

49  
50 Sample characteristics and displayed in table 1.  
51  
52  
53

54  
55 Table 1. Characteristics of participants.

|       | Cohorts |      |      |
|-------|---------|------|------|
| Total | 2002    | 2006 | 2010 |
|       |         |      |      |

|              | n    | %    | n    | %    | n    | %    | n    | %    |
|--------------|------|------|------|------|------|------|------|------|
| Sex          |      |      |      |      |      |      |      |      |
| Boys         | 4067 | 47.9 | 1466 | 48.5 | 1261 | 49.3 | 1340 | 46.1 |
| Girls        | 4416 | 52.1 | 1557 | 51.5 | 1298 | 50.7 | 1561 | 53.9 |
| Age          |      |      |      |      |      |      |      |      |
| 11-13        | 4266 | 50.3 | 1746 | 57.8 | 1275 | 49.8 | 1245 | 42.9 |
| 15-17        | 4217 | 49.7 | 1277 | 42.2 | 1284 | 50.2 | 1656 | 57.1 |
| School grade |      |      |      |      |      |      |      |      |
| Sixth grade  | 4348 | 51.3 | 1809 | 59.8 | 1275 | 49.8 | 1264 | 43.5 |
| Tenth grade  | 4135 | 48.7 | 1214 | 40.2 | 1284 | 50.2 | 1637 | 56.5 |

Descriptive statistics and the differences among HBSC survey years for each age group and sex are presented in table 2.

For the boys aged 11-13, the number of times they reported practicing PA during the last 7 days was between  $4.2\pm 2.1$  to  $4.4\pm 2.1$  times. At the age of 15-17 they reported practicing  $3.5\pm 1.9$  times a week in 2002,  $3.9\pm 1.9$  in 2006 and  $3.8\pm 1.9$  in 2010, with a significant increase from 2002 to 2006/2010 ( $p<0.05$ ). In both age groups the prevalence of PA over the last 6 months decreased slightly between 2006 and 2010, but decreased significantly between 2006 and 2010 ( $p<0.05$  and  $p<0.01$ ). Soccer was the most practiced sports activity, but over the years there was a significant decline in the number of participants ( $p<0.001$  for both age-groups). On the other hand, gymnastics participation decreased from 2002 to 2006 and then increased from 2006 to 2010, reaching the higher value in 2010 for the ages of 11-13 ( $p<0.05$ ) and 15-17 years ( $p<0.05$ ). The type of PA practiced changed over the years for the younger participants, decreasing the number of team sports participants and increasing participation in individual sports ( $p<0.01$ ). Boys, younger and older, preferred team sports activities more than individual activities. However, over the years, young boys participation in team sports decreased progressively from 2002 to 2010 ( $p<0.01$ ).

Girls reported practicing PA between  $3.3\pm 1.9$  to  $3.5\pm 1.9$  at the age of 11-13, and  $2.7\pm 1.9$  to  $2.9\pm 1.7$  at the age of 15-17. Soccer, gymnastics, and swimming were the most popular sports activities. Over the years, the number of soccer practitioners significantly decreased among younger girls ( $p<0.001$ ). For the older girls, the number of participants

decreased significantly from 2002 to 2006 and then increased significantly from 2006 to 2010 ( $p<0.001$ ). In respect to gymnastics, the number of participants decreased significantly from 2002 to 2006/2010 for both younger ( $p<0.01$ ) and older girls ( $p<0.01$ ). The number of older girls that practiced volleyball was inconsistent, decreasing significantly from 2002 to 2006 and increasing significantly again from 2006 to 2010 ( $p<0.05$ ). Girls aged 11-13, preferred individual sports activities rather than team sports activities over the years ( $p<0.05$ ). On the other hand, among older girls, participants in individual sports activities decreased significantly from 2006 to 2010 ( $p<0.01$ ).

Table 2. Boys' and girls' physical activity participation in 2002, 2006 and 2010, according age group.

|                                           | 11-13 years     |                 |                 |          | 15-17 years     |                 |                 |                    |
|-------------------------------------------|-----------------|-----------------|-----------------|----------|-----------------|-----------------|-----------------|--------------------|
|                                           | 2002<br>(n=865) | 2006<br>(n=686) | 2010<br>(n=625) | <i>p</i> | 2002<br>(n=601) | 2006<br>(n=575) | 2010<br>(n=715) | <i>p</i>           |
| <b>Boys</b>                               |                 |                 |                 |          |                 |                 |                 |                    |
| PA in the last 7 days (M±SD) <sup>1</sup> | 4.2±2.1         | 4.4±2.1         | 4.3±2.1         | 0.243    | 3.5±1.9         | 3.9±1.9         | 3.8±1.9         | 0.019 <sup>a</sup> |
| PA in the last 6 month (%) <sup>2</sup>   |                 |                 |                 | 0.012    |                 |                 |                 | 0.001              |
| Did not practice PA                       | 5.4             | 5.5             | 9.0             |          | 11.1            | 12.9            | 18.0            |                    |
| Practiced PA                              | 94.6            | 94.5            | 91.0            |          | 88.9            | 87.1            | 82.0            |                    |
| Sports practiced (%) <sup>2</sup>         |                 |                 |                 |          |                 |                 |                 |                    |
| Soccer                                    | 72.6            | 69.8            | 60.8            | <0.001   | 57.1            | 50.1            | 44.3            | <0.001             |
| Basketball                                | 22.1            | 26.4            | 22.4            | 0.102    | 16.6            | 12.7            | 13.7            | 0.130              |
| Volleyball                                | 8.6             | 12.4            | 10.6            | 0.089    | 9.2             | 7.8             | 8.1             | 0.683              |
| Handball                                  | 9.7             | 11.8            | 11.2            | 0.388    | 8.3             | 7.1             | 7.0             | 0.619              |
| Swimming                                  | 18.0            | 15.3            | 17.3            | 0.352    | 15.8            | 13.6            | 15.5            | 0.500              |
| Athletics                                 | 12.7            | 13.8            | 13.1            | 0.806    | 8.2             | 7.7             | 9.2             | 0.575              |
| Gymnastics                                | 17.5            | 17.1            | 22.2            | 0.027    | 7.0             | 3.8             | 6.7             | 0.038              |
| Cycling                                   | 22.7            | 24.2            | 21.4            | 0.490    | 18.5            | 16.7            | 14.7            | 0.181              |
| Type of sport activity <sup>2</sup>       |                 |                 |                 | 0.008    |                 |                 |                 | 0.524              |
| Individual                                | 8.7             | 8.3             | 13.0            |          | 13.3            | 13.6            | 13.4            |                    |
| Team                                      | 40.9            | 38.2            | 33.8            |          | 41.3            | 38.4            | 33.0            |                    |
| Individual and collective                 | 38.5            | 37.8            | 34.9            |          | 24.6            | 19.7            | 19.7            |                    |
| <b>Girls</b>                              |                 |                 |                 |          |                 |                 |                 |                    |
| PA in the last 7 days (M±SD) <sup>1</sup> | 3.5±1.9         | 3.3±1.9         | 3.4±1.9         | 0.456    | 2.7±1.9         | 2.7±1.7         | 2.9±1.7         | 0.056              |
| PA in the last 6 month (%) <sup>2</sup>   |                 |                 |                 | 0.491    |                 |                 |                 | 0.745              |
| Did not practice PA                       | 15.7            | 13.4            | 14.8            |          | 31.8            | 30.7            | 32.5            |                    |
| Practiced PA                              | 84.3            | 86.6            | 85.2            |          | 68.2            | 69.3            | 67.5            |                    |
| Sports practiced (%) <sup>2</sup>         |                 |                 |                 |          |                 |                 |                 |                    |
| Soccer                                    | 35.3            | 31.4            | 25.8            | <0.001   | 15.7            | 9.7             | 16.7            | <0.001             |
| Basketball                                | 17.8            | 16.6            | 18.7            | 0.640    | 9.3             | 7.2             | 9.6             | 0.189              |
| Volleyball                                | 14.0            | 11.0            | 10.3            | 0.069    | 13.6            | 9.7             | 14.5            | 0.012              |
| Handball                                  | 6.1             | 6.3             | 8.4             | 0.191    | 2.7             | 3.8             | 5.8             | 0.006              |
| Swim                                      | 25.0            | 21.2            | 21.0            | 0.112    | 13.5            | 14.8            | 13.9            | 0.757              |

|                                     |      |      |      |       |      |      |      |       |
|-------------------------------------|------|------|------|-------|------|------|------|-------|
| Athletics                           | 12.4 | 11.0 | 13.7 | 0.370 | 5.8  | 5.4  | 7.5  | 0.155 |
| Gymnastics                          | 36.1 | 28.4 | 29.4 | 0.002 | 15.4 | 10.4 | 9.5  | 0.001 |
| Cycling                             | 12.8 | 10.7 | 10.0 | 0.195 | 6.2  | 6.1  | 6.1  | 0.993 |
| Type of sport activity <sup>2</sup> |      |      |      | 0.015 |      |      |      | 0.002 |
| Individual                          | 28.0 | 26.8 | 28.4 |       | 21.2 | 21.6 | 16.3 |       |
| Team                                | 17.0 | 21.1 | 14.7 |       | 19.2 | 13.7 | 18.8 |       |
| Individual and collective           | 30.0 | 23.2 | 25.0 |       | 11.4 | 8.5  | 12.0 |       |

PA, physical activity

<sup>1</sup> Tested by ANOVA.

<sup>2</sup> Tested by Chi Square.

<sup>a</sup> Data from 2002 is statically different from 2006 and 2010. Tested by Tukey's HSD.

Table 3 presents PA information from 2 different cohorts, 4 years apart. Among boys, PA practices during the last 7 days decreased from 4.2±2.1 to 3.9±1.9 between 2002 and 2006 ( $p<0.001$ ) and decreased 4.4±2.1 to 3.8±1.9 between 2006 and 2010 ( $p<0.001$ ). The prevalence of PA practiced over the last 6 month also declined significantly in both cohorts ( $p<0.001$ ). Looking at the different sports activities, the number of practitioners decreased over the years in almost all activities. It is noteworthy that only volleyball from 2002 to 2006 and swimming from 2006 to 2010 remained relatively stable. In both cohorts, as age increased the number of participants of team sports activities declined, and, in contrast, participants of individual activities significantly increased ( $p<0.001$ ).

Among girls, PA practices during the last 7 days declined significantly from 3.5±1.9 to 2.7±1.7 between 2002 and 2006 ( $p<0.001$ ), and from 3.3±1.9 to 2.9±1.7 between 2006 and 2010 ( $p<0.001$ ). Similar to what was observed among boys, the prevalence of PA over the last 6 months decreased in both cohorts ( $p<0.001$ ). The practice of PA decreased significantly in all sports activities from 2002 to 2006. Data from 2006 and 2010 shows that the practice of PA also declined, with the exception of handball which remained stable and volleyball which, in contrast to other sports, had a marginally significant increase ( $p=0.052$ ). Girls team and individual sports participation decreased between 2002 and 2006 ( $p<0.001$ ) and between 2006 and 2010 ( $p<0.01$ ).

Table 3. Boys' and girls' physical activity participation over the years.

|                                           | 2002                   | 2006                   | <i>p</i> | 2006                   | 2010                   | <i>p</i> |
|-------------------------------------------|------------------------|------------------------|----------|------------------------|------------------------|----------|
|                                           | 11-13 years<br>(n=865) | 15-17 years<br>(n=575) |          | 11-13 years<br>(n=686) | 15-17 years<br>(n=715) |          |
| <b>Boys</b>                               |                        |                        |          |                        |                        |          |
| PA in the last 7 days (M±SD) <sup>1</sup> | 4.2±2.1                | 3.9±1.9                | 0.001    | 4.4±2.1                | 3.8±1.9                | <0.001   |
| PA in the last 6 month (%) <sup>2</sup>   |                        |                        | <0.001   |                        |                        | <0.001   |
| Did not practice PA                       | 5.4                    | 12.6                   |          | 5.5                    | 18.0                   |          |
| Practiced PA                              | 94.6                   | 87.4                   |          | 94.5                   | 82.0                   |          |
| Sports practiced (%) <sup>2</sup>         |                        |                        |          |                        |                        |          |
| Soccer                                    | 72.6                   | 51.1                   | <0.001   | 69.8                   | 45.1                   | <0.001   |
| Basketball                                | 22.1                   | 13.9                   | <0.001   | 26.4                   | 14.0                   | <0.001   |
| Volleyball                                | 8.6                    | 8.6                    | 0.082    | 12.4                   | 9.1                    | 0.010    |
| Handball                                  | 9.7                    | 6.9                    | 0.104    | 11.8                   | 7.2                    | 0.002    |
| Swimming                                  | 18.0                   | 13.6                   | 0.029    | 15.3                   | 15.2                   | 0.941    |
| Athletics                                 | 12.7                   | 7.8                    | 0.002    | 13.8                   | 9.3                    | 0.007    |
| Gymnastics                                | 17.5                   | 4.7                    | <0.001   | 17.1                   | 7.1                    | <0.001   |
| Cycling                                   | 22.7                   | 17.0                   | 0.006    | 24.2                   | 14.8                   | <0.001   |
| Type of sport activity <sup>2</sup>       |                        |                        | <0.001   |                        |                        | <0.001   |
| Individual                                | 8.7                    | 13.6                   |          | 8.3                    | 13.4                   |          |
| Team                                      | 40.9                   | 38.4                   |          | 38.2                   | 33.0                   |          |
| Individual and collective                 | 38.5                   | 19.7                   |          | 37.8                   | 19.7                   |          |
| <b>Girls</b>                              |                        |                        |          |                        |                        |          |
| PA in the last 7 days (M±SD) <sup>1</sup> | 3.5±1.9                | 2.7±1.7                | <0.001   | 3.3±1.9                | 2.9±1.7                | <0.001   |
| PA in the last 6 month (%) <sup>2</sup>   |                        |                        | <0.001   |                        |                        | <0.001   |
| Did not practice PA                       | 15.7                   | 30.1                   |          | 13.4                   | 32.1                   |          |
| Practiced PA                              | 84.3                   | 69.9                   |          | 86.6                   | 67.9                   |          |
| Sports practiced (%) <sup>2</sup>         |                        |                        |          |                        |                        |          |
| Soccer                                    | 35.3                   | 11.1                   | <0.001   | 31.4                   | 16.6                   | <0.001   |
| Basketball                                | 17.8                   | 7.5                    | <0.001   | 16.6                   | 9.7                    | <0.001   |
| Volleyball                                | 14.0                   | 10.0                   | 0.011    | 11.0                   | 14.5                   | 0.052    |
| Handball                                  | 6.1                    | 3.7                    | 0.039    | 6.3                    | 5.9                    | 0.741    |
| Swimming                                  | 25.0                   | 14.8                   | <0.001   | 21.2                   | 13.7                   | <0.001   |
| Athletics                                 | 12.4                   | 5.2                    | <0.001   | 11.0                   | 7.4                    | 0.021    |
| Gymnastics                                | 36.1                   | 11.1                   | <0.001   | 28.4                   | 10.0                   | <0.001   |
| Cycling                                   | 12.8                   | 6.1                    | <0.001   | 10.7                   | 6.1                    | 0.002    |
| Type of sport activity <sup>2</sup>       |                        |                        | <0.001   |                        |                        | 0.004    |
| Individual                                | 28.0                   | 21.6                   |          | 26.8                   | 16.3                   |          |
| Team                                      | 17.0                   | 13.7                   |          | 21.1                   | 18.8                   |          |
| Individual and collective                 | 30.0                   | 8.5                    |          | 23.2                   | 12.0                   |          |

<sup>1</sup> Tested by t Test.

<sup>2</sup> Tested by Chi Square.

## DISCUSSION

This is the first study among Portuguese adolescents to explore the PA and sport participation of different cohorts, collecting data through the same standard protocol. The goal of the study was, using three-cohort of representative samples of Portuguese adolescents, to investigate the prevalence of PA and sport participation among Portuguese adolescents, and understand how it changed between 2002 and 2010. Overall, the study points to age as a



1  
2  
3 factor related to diminished PA participation. The study also revealed that the prevalence of  
4  
5 PA and sport participation have decreased over the years for the same age groups.  
6

7  
8 Younger and older adolescents reported practicing PA less than 7 times a week.  
9  
10 Although it was not assessed the duration and intensity of PA, results indicated that  
11  
12 adolescents do not get enough practiced to meet the recommended levels of 60 minutes of  
13  
14 moderate to vigorous PA each day.[5] This is in line with other recent studies among  
15  
16 Portuguese people that described the prevalence of PA.[8, 12] Because our data is from  
17  
18 different HBSC waves, it was possible to observe the evolution of PA in each age group over  
19  
20 the 2002-2010 time frames. With the exception of boys aged 15-17, there were no significant  
21  
22 changes over the years in regard to PA practiced during the last 7 days. Moreover, there was a  
23  
24 decrease in the prevalence of PA over the last 6 months, especially among boys. These results  
25  
26 can be interpreted in several different ways. First, strategies to increase the number of times  
27  
28 that adolescents practice PA have not been successful. Second, adolescents and adults may  
29  
30 not be aware of the recommended levels of PA for young people. Consequently they might  
31  
32 assume that they are active enough and therefore may conclude that there is no need to be  
33  
34 more physically active.[20] Third, schools, even though called to give greater attention to  
35  
36 provision of PA for students,[21] seem to have failed at promoting PA. Results indicate that  
37  
38 there has been no progress made toward attaining this goal.  
39  
40  
41

42  
43 Adolescent behaviour, such as PA and inactivity over the years, is an issue rarely  
44  
45 studied in Portugal. This type of study is important and should be of interest on a national and  
46  
47 international level because it helps policy makers, educators and health professionals to  
48  
49 understand young people's health in their social context and tracks changes as they develop  
50  
51 over the years. Therefore, with data from successive surveys, trends can be identified making  
52  
53 it possible to evaluate more accurately the impact of programs and strategies implemented in  
54  
55 order to promote PA and reduce sedentary behaviour among adolescents. While the HBSC  
56  
57  
58  
59  
60

1  
2  
3 conducts national[13-15] and international systematic surveys,[6, 16] in the United States of  
4  
5 America, the Center for Disease Control and Prevention also conducts a periodic survey of  
6  
7 adolescent health risk and health protective behaviours.[22] This shows the importance of  
8  
9 studying and tracking adolescent behaviour and allows cross-national comparisons.  
10

11 The trend of PA declining with age was significant among boys and girls in the two  
12  
13 different cohorts of adolescents (2002 to 2006 and 2006 to 2010). These results are similar to  
14  
15 those found in others studies with adolescents from Portugal[23] and other countries.[6, 7] In  
16  
17 Europe, the inverse relationship between PA and age is common in most countries.[6]  
18  
19 Riddoch et al.[24], in what is considered the first study to objectively measure physical  
20  
21 activity with a representative sample of European children, verified that 9 year old children  
22  
23 were considerably more active than 15 year old adolescents, presenting similar results in all  
24  
25 countries. Virtually all 9 year old children practiced the recommended amount of PA, or more  
26  
27 than recommended, while only a small percentage of 15 year olds did so. This indicated that  
28  
29 as age increased PA decreased.  
30  
31  
32  
33

34 The decline of PA with age has triggered much discussion in the scientific community.  
35  
36 Sallis[25] analysed various studies related to the decline of PA, and concluded that the ages  
37  
38 between 13 and 18 are at risk. Having also observed the decline in animals, the author was  
39  
40 lead to suppose that the decline had a biological origin. The consistency of the results of the  
41  
42 Riddoch et al.[24] among adolescents from different countries is in some way congruent with  
43  
44 Sallis'[25] assumptions, allowing one to conclude that children's and adolescents' PA is  
45  
46 probably determined biologically. However, although the effect of age is significant on PA, it  
47  
48 sometimes only explained 1% of the variability[26] which means that the decline in PA with  
49  
50 age could be related to other factors such as the great academic pressure adolescents are  
51  
52 under,[27] longer time in sedentary activities such as screen time [28], and having part-time  
53  
54  
55  
56  
57  
58  
59  
60

1  
2  
3 jobs to earn some money.[29] Therefore, qualitative studies to understand clearly the reasons  
4  
5 for the decrease in PA among adolescents are needed.  
6

7 Soccer was the most practiced sports activity among boys and older girls over the  
8  
9 years and at different ages. This is understandable since it is the most popular sports activity  
10  
11 in Portugal and it is the activity with the most participants.[30, 31] Nevertheless, the number  
12  
13 of participants decreased over the years within both age-groups. As the number of participants  
14  
15 in others sports activities did not increase significantly, this suggests that the decrease of  
16  
17 soccer participants might be related to the prevalence of adolescents who did not practice PA  
18  
19 over the last 6 month. This shows the importance of soccer as a sports activity among  
20  
21 Portuguese adolescents. Thus, when considering an intervention aimed to increase PA, soccer  
22  
23 should be considered as an activity that attracts adolescents.  
24  
25  
26

27 The type of activity practiced by boys has the tendency to change over the years.  
28  
29 While the number of team sports participants decreased between 11-13 and 15-17 years,  
30  
31 participation in individual sports increased. On the other hand, for the girls, participation in  
32  
33 both individual and team sports decreased with age. The reason for the choice of individual or  
34  
35 team sports may be related to social factors, and some could argue that team sports would be  
36  
37 better for the development of social skills. However, studies have shown that there is no  
38  
39 difference in social self-esteem between participants in individual or team sports.[32, 33] For  
40  
41 the older boys the increased participation in individual sports may be related to their level of  
42  
43 autonomy.  
44  
45  
46

47 The present study had some limitations. Measurements of PA were based on self-  
48  
49 report. Self-report generally has limited reliability and validity.[34] So, the use of accurate  
50  
51 objective measures is preferable, but it is not often feasible in epidemiological studies with  
52  
53 large samples. Moreover, the intensity and duration of PA were not measured. These  
54  
55  
56  
57  
58  
59  
60

1  
2  
3 evaluations would be useful in determining the prevalence of adolescents who attained  
4  
5 recommended levels of PA.  
6

7  
8 There are also several strengths in the present study. First, data from a representative  
9  
10 sample was collected. Second, data from three different cohorts was collected (2002, 2006  
11  
12 and 2010), using a standard protocol, which allows for comparisons and for understanding of  
13  
14 the differences of PA over the years in two different age groups of boys and girls.  
15

### 16 17 18 **CONCLUSION** 19

20  
21 The prevalence of physical inactivity increased significantly among boys between ages  
22  
23 11-13 and 15-17, but not in girls. The number of times adolescents practiced PA during the  
24  
25 last 7 days remained relatively stable, which means that the campaigns and attempts to  
26  
27 increase PA among adolescents have not been very successful. With age, there was a  
28  
29 significant decrease in most sports activities among boys and girls. This indicated that as  
30  
31 adolescents are getting older they may have different interests leading some to stop practicing  
32  
33 PA. These findings imply that it is important to more effectively promote PA among  
34  
35 adolescents, using different strategies based on age and sex.  
36  
37  
38  
39  
40  
41  
42  
43  
44  
45  
46  
47  
48  
49  
50  
51  
52  
53  
54  
55  
56  
57  
58  
59  
60

1  
2  
3  
4  
5  
6  
7  
8  
9  
10  
11  
12  
13  
14  
15  
16  
17  
18  
19  
20  
21  
22  
23  
24  
25  
26  
27  
28  
29  
30  
31  
32  
33  
34  
35  
36  
37  
38  
39  
40  
41  
42  
43  
44  
45  
46  
47  
48  
49  
50  
51  
52  
53  
54  
55  
56  
57  
58  
59  
60

### **Acknowledgments**

The authors thank the adolescents for their participation in the study. We also thank Joyce Voelker for revising the document.

### **Funding**

The HBSC study in Portugal was funded by public funds: Ministry of Health and Ministry of Education and Science.

### **Contributorship Statement**

AM and MGM contributed in conception and design. MGM contributed in acquisition of the data. AM and MGM contributed in analysis and interpretation of the data. AM contributed to the drafting of the manuscript. AM and MGM contributed to the revisions of the manuscript and the interpretation of the findings.

### **Competing interests**

The authors declare that they have no competing interests.

### **Data Sharing Statement**

No additional data available

## REFERENCES

1. Janssen I, Leblanc AG. Systematic review of the health benefits of physical activity and fitness in school-aged children and youth. *Int J Behav Nutr Phys Act* 2010;7:40.
2. Allender S, Kremer P, de Silva-Sanigorski A, et al. Associations between activity-related behaviours and standardized BMI among Australian adolescents. *J Sci Med Sport* 2011;14:512-21.
3. Santos MP, Oliveira J, Ribeiro JC, et al. Active travel to school, BMI and participation in organised and non-organised physical activity among Portuguese adolescents. *Prev Med* 2009;49:497-9.
4. Telama R, Yang X, Viikari J, et al. Physical activity from childhood to adulthood: a 21-year tracking study. *Am J Prev Med* 2005;28:267-73.
5. WHO. Global recommendations on physical activity for health. Geneva, Suíça: World Health Organization; 2010.
6. Currie C, Zanotti C, Morgan A, et al. Social determinants of health and well-being among young people. Health Behaviour in School-aged Children (HBSC) study: International Report From the 2009/2010 survey. Copenhagen: WHO Regional Office for Europe; 2012.
7. Hallal PC, Andersen LB, Bull FC, et al. Global physical activity levels: surveillance progress, pitfalls, and prospects. *Lancet* 2012;380:247-57.
8. Baptista F, Santos DA, Silva AM, et al. Prevalence of the Portuguese population attaining sufficient physical activity. *Med Sci Sports Exerc* 2012;44:466-73.

- 1  
2  
3 9. Marques A, André J, Martins J, et al. The prevalence of sedentary behaviours and  
4 physical activity of urban adolescents. A cross-sectional study using ecological momentary  
5 assessment. *Mitt Klosterneuburg* 2014;64:427-35.
- 6  
7  
8  
9  
10 10. Woods CB, Tannehill D, Quinlan A, et al. Children's sport participation and physical  
11 activity study (CSPPA). Dublin, Ireland: Dublin City University and Irish Sports Council,  
12 2010.
- 13  
14  
15  
16 11. Wichstrom L, von Soest T, Kvaalem IL. Predictors of growth and decline in leisure  
17 time physical activity from adolescence to adulthood. *Health Psychol* 2013;32:775-84.
- 18  
19  
20  
21 12. Marques A, Carreiro da Costa F. Levels of physical activity of urban adolescents  
22 according to age and gender. *Int J Sports Sci* 2013;3:23-7.
- 23  
24  
25  
26 13. Matos MG, Equipa Aventura Social. A saúde dos adolescentes portugueses (Quatro  
27 anos depois) [The health of Portuguese adolescents (Four years later)]. Lisboa: Edições FMH;  
28 2003.
- 29  
30  
31  
32 14. Matos MG, Equipa Aventura Social. A Saúde dos Adolescentes Portugueses - Hoje e  
33 em 8 anos - Relatório Preliminar do Estudo HBSC 2006 [The Portuguese Adolescent Health  
34 - Today and in eight years - Preliminary Report of the HBSC study in 2006]. Cruz Quebrada:  
35 Faculdade de Motricidade Humana; 2006.
- 36  
37  
38  
39  
40  
41 15. Matos MG, Simões C, Tomé G, et al. Aventura social & saúde. A saúde dos  
42 adolescentes portugueses. Relatório do estudo HBSC 2010 [Social adventure & Health. The  
43 health of Portuguese adolescents. Report of the 2010 HBSC study]. Cruz-Quebrada:  
44 Faculdade de Motricidade Humana; 2011.
- 45  
46  
47  
48  
49 16. Currie C, Hurrelmann K, Settertobulte W, et al. Health and health behavior among  
50 young people. *Health Behaviour in School-aged Children: a WHO cross-national study*  
51 (HBSC). Copenhagen: World Health Organization; 2000.
- 52  
53  
54  
55  
56  
57  
58  
59  
60

- 1  
2  
3 17. Currie C. Health Behaviour in School-Aged Children. Research protocol for the 1997-  
4  
5 98 survey. A World Health Organization Cross-National Study. Edinburgh University of  
6  
7 Edinburgh; 1998.
- 8  
9  
10 18. Caspersen CJ, Powell KE, Christenson GM. Physical activity, exercise, and physical  
11  
12 fitness: definitions and distinctions for health-related research. Public Health Rep  
13  
14 1985;100:126-31.
- 15  
16 19. Sallis JF, Buono MJ, Roby JJ, et al. Seven-day recall and other physical activity self-  
17  
18 reports in children and adolescents. Med Sci Sports Exerc 1993;25:99-108.
- 19  
20 20. Marques A, Martins J, Ramos M, et al. Perception and reality - Portuguese adults'  
21  
22 awareness of active lifestyle. Eur J Sport Sci 2013;14:468-74.
- 23  
24 21. Pate RR, Davis MG, Robinson TN, et al. Promoting physical activity in children and  
25  
26 youth: a leadership role for schools: a scientific statement from the American Heart  
27  
28 Association Council on Nutrition, Physical Activity, and Metabolism (Physical Activity  
29  
30 Committee) in collaboration with the Councils on Cardiovascular Disease in the Young and  
31  
32 Cardiovascular Nursing. Circulation 2006;114:1214-24.
- 33  
34 22. Brener ND, Kann L, Shanklin S, et al. Methodology of the Youth Risk Behavior  
35  
36 Surveillance System--2013. MMWR - Recommendations and Reports 2013;62:1-20.
- 37  
38 23. Seabra AFTE, Ribeiro Maia JA, Mendonca DM, et al. Age and sex differences in  
39  
40 physical activity of Portuguese adolescents. Med Sci Sports Exerc 2008;40:65-70.
- 41  
42 24. Riddoch CJ, Bo Andersen L, Wedderkopp N, et al. Physical activity levels and  
43  
44 patterns of 9- and 15-yr-old European children. Med Sci Sports Exerc 2004;36:86-92.
- 45  
46 25. Sallis JF. Age-related decline in physical activity: a synthesis of human and animal  
47  
48 studies. Med Sci Sports Exerc 2000;32:1598-600.
- 49  
50 26. Cantera-Garde M, Devís-Devís J. Physical activity levels of secondary school Spanish  
51  
52 adolescents. Eur J Phys Educ 2000;5:28-44.
- 53  
54  
55  
56  
57  
58  
59  
60



- 1  
2  
3 27. Lee KS, Trost SG. Physical activity patterns of Singaporean adolescents. *Pediatr Exerc*  
4  
5 *Sci* 2006;18:400-14.  
6  
7 28. Sharif I, Sargent JD. Association between television, movie, and video game exposure  
8  
9 and school performance. *Pediatrics* 2006;118:E1061-E70.  
10  
11 29. Malina R, Bouchard C, Bar-Or O. Risk factors during growth and adult health. In:  
12  
13 Malina R, Bouchard C, Bar-Or O, editors. *Growth, maturation, and physical activity*.  
14  
15 Champaign: Human Kinetics; 2004. p. 587-608.  
16  
17 30. Costa V, Serôdio-Fernandes A, Maia M. Hábitos desportivos dos jovens do interior  
18  
19 norte e litoral norte de Portugal. *Rev Port Ciênc Desporto* 2009;9:46-55.  
20  
21 31. Marivoet S. Hábitos desportivos da população portuguesa. Lisboa: Ministério da  
22  
23 Juventude e do Desporto. Instituto Nacional de Formação e Estudos do Desporto; 2001.  
24  
25 32. Dinc Z. Social Self-Efficacy of Adolescents Who Participate in Individual and Team  
26  
27 Sports. *Soc Behav Personal* 2011;39:1417-23.  
28  
29 33. Wann DL, Lingle SE. Comparison of Team and Individual Sports Participants  
30  
31 Tendencies to Join Groups. *Percept Motor Skill* 1994;79:833-4.  
32  
33 34. Shephard RJ. Limits to the measurement of habitual physical activity by  
34  
35 questionnaires. *Brit J Sport Med* 2003;37:197-206.  
36  
37  
38  
39  
40  
41  
42  
43  
44  
45  
46  
47  
48  
49  
50  
51  
52  
53  
54  
55  
56  
57  
58  
59  
60

**Title page**

Adolescents' physical activity trends over the years. A three-cohort study based on the Health Behaviour in School-aged Children (HBSC) Portuguese survey

Adilson Marques<sup>1,2</sup>, Margarida Gaspar de Matos<sup>2,3</sup>

<sup>1</sup> Projeto Aventura Social, Lisboa, Portugal

<sup>2</sup> Centro Interdisciplinar de Estudo da Performance Humana, Faculdade de Motricidade Humana, Faculdade de Motricidade Humana, Universidade de Lisboa

<sup>3</sup> Centro de Malária e Outras Doenças Tropicais (CMDT), Lisboa, Portugal

Corresponding author: Adilson Marques, CIPER, Faculdade de Motricidade Humana, Universidade de Lisboa, Estrada da Costa, 1499-002, Cruz Quebrada, Dafundo, Portuga.

Telephone: (00351) 214149100, E-mail: amarques@fmh.ulisboa.pt

Keywords: epidemiology; preventive medicine, sports medicine

Word count for body text: 2570 words

## Abstract

**Objective:** Many young people do not practice enough physical activity (PA) to benefit their health. The study aimed to investigate the prevalence of PA and understand the trends between 2002 and 2010, using three-cohort of representative samples of Portuguese adolescents.

**Design, setting and participants:** Participants were 8483 adolescents (4067 boys, 4416 girls), that participated in the Health Behavior in School-aged Children Portuguese survey in 2002, 2006 and 2010.

**Design, setting and participants:** A questionnaire was used to collected data of physical activity. Analyses were run separately for boys and girls.

**Results:** For the boys, at the age of 15-17 they reported practicing  $3.5 \pm 1.9$  times a week in 2002,  $3.9 \pm 1.9$  in 2006 and  $3.8 \pm 1.9$  in 2010, with a significant increase from 2002 to 2006/2010 ( $p < 0.05$ ). PA practice during the last 7 days decreased from  $4.2 \pm 2.1$  to  $3.9 \pm 1.9$  between 2002 and 2006 ( $p < 0.001$ ) and decreased  $4.4 \pm 2.1$  to  $3.8 \pm 1.9$  between 2006 and 2010 ( $p < 0.001$ ). Among girls, PA practices during the last 7 days declined significantly from  $3.5 \pm 1.9$  to  $2.7 \pm 1.7$  between 2002 and 2006 ( $p < 0.001$ ), and from  $3.3 \pm 1.9$  to  $2.9 \pm 1.7$  between 2006 and 2010 ( $p < 0.001$ ).

**Conclusions:** The study points to age as a factor related to diminished PA participation. The study also revealed that the prevalence of PA has decreased over the years for the same age groups.

### Strengths and limitations of this study

– Data from a representative sample was collected from three different cohorts (2002, 2006 and 2010), using a standard protocol, which allows for comparisons and for

1  
2  
3 understanding of the differences of PA over the years in two different age groups of boys and  
4  
5 girls.

6  
7 – Measurements of PA were based on self-report. Self-report generally has limited  
8  
9 reliability and validity. So, the use of accurate objective measures is preferable, but it is not  
10  
11 often feasible in epidemiological studies with large samples.  
12

13  
14 – Boys and girls do not practice enough physical activity to meet the recommended  
15  
16 levels of 60 minutes in moderate to vigorous intensity on all or most days of the week. From a  
17  
18 public health perspective there is a need to augment the time spent on physical activity.  
19

20  
21 – Soccer is the most practiced sports activity among boys and older girls. Thus, when  
22  
23 considering an intervention aimed to increase PA, soccer should be considered as an activity  
24  
25 that attracts adolescents.  
26  
27  
28  
29  
30  
31  
32  
33  
34  
35  
36  
37  
38  
39  
40  
41  
42  
43  
44  
45  
46  
47  
48  
49  
50  
51  
52  
53  
54  
55  
56  
57  
58  
59  
60

## INTRODUCTION

Young people's participation in physical activity (PA) is associated with health benefits, specifically improved bone mineral density, aerobic fitness, muscular strength, endurance, cardiovascular risk factor and mental health.[1] There is also a negative relationship between PA and careless nutrition, overweight and obesity among young people.[2, 3] Additionally, PA incorporated as a personal habit at a young age may persist into adulthood.[4] Thus, current guidelines from the World Health Organization (WHO) recommend that young people should engage in at least 60 minutes of PA in moderate to vigorous (MVPA) intensity on all or most days of the week.[5]

In spite of the health benefits, data suggests that many young people are not engaging in PA of sufficient length and intensity to benefit their health.[6, 7] The Portuguese figures are quite dramatic, revealing that only 36% of children aged 10-11 and 4% of adolescents aged 16-17 were considered sufficiently active.[8] Besides the lower levels of PA, the prevalence of active children and adolescents tended to decrease with age, particularly among girls.

In order to intervene and reverse this situation, it is important to understand the trends of PA over the years as well as the PA practices of adolescents. Nonetheless, because most adolescents do not commute actively to school, do not spend much time on PA and spend excessive time in sedentary behaviours[9], it is important to highlight sport participation. Studies have shown that sport participation contributes to adolescent attained PA guidelines,[10] and there is evidence that adolescents who participated in sports are more persistent exercisers than non-participants[11]. Nevertheless, mMost studies related to PA and sports participation are cross sectional[8, 9, 12] and results can only be interpreted in the light of the period in which they were collected. Since little is known about the PA and sport participation practices of adolescents and how they have evolved over the years, studies that

1  
2  
3 allow researchers to compare patterns and practices of PA [and sport participation](#) are needed.

4  
5 Therefore, the present study, using three-cohort of representative samples of Portuguese

6  
7 adolescents, aimed to investigate the prevalence of PA [and sport participation](#) among

8  
9 Portuguese adolescents and understand how it has changed between 2002 and 2010.  
10

## 11 12 13 14 **METHODS**

### 15 16 **Participants**

17  
18 A proportionate nationally representative sample of 848~~35~~ adolescents (4067 boys,  
19  
20 4416 girls), randomly selected from grades 6 and 10 participated in the Health Behaviour in  
21  
22 School-aged Children (HBSC) Portuguese survey in 2002 (n=3023), 2006 (n=2556), and  
23  
24 2010 (n=2904).[13-15] HBSC Portugal is one of 43 countries and regions across Europe and  
25  
26 North America that make up the HBSC Network. HBSC collects data every four years on  
27  
28 children's and adolescent's health and well-being, social environments and health behaviors.  
29  
30 Data is used at a national and international level to add new vision into young people's health  
31  
32 and well-being, understand the social and psychological determinants of health, and  
33  
34 incorporate policies to improve young people's lives. The methodological aspects of the  
35  
36 HBSC study are well developed and published internationally.[16] The study received  
37  
38 approval from the Ethical Committee of Porto Medical School and the Portuguese National  
39  
40 Data Protection System. All school administrators gave their consent, legal guardians gave  
41  
42 written informed consent, and students provided assent.  
43  
44  
45  
46

### 47 48 **Measures**

49  
50 [For data collection was used a questionnaire that was designed by the international](#)  
51  
52 [HBSC members and is described in detail elsewhere.](#)[16, 17] To assess PA, adolescents were  
53  
54 provided with a common definition of PA,[18] and then were asked "How many days did you  
55  
56 practice PA during the last 7 days?" Answers were given on an 8-point scale (1 = none to 8 =  
57  
58  
59  
60

1  
2  
3 daily). Seven days of PA recall is shown to be reliable and valid for use in research on PA in  
4  
5 adolescents.[19] Adolescents were also asked if they practiced regular PA during the last 6  
6  
7 months. Answers were yes ( $\geq 3$  times a weeks) or no ( $<3$  times a week). The item has a high  
8  
9 reliability, with intraclass correlation coefficients (one-week interval) of 0.95. Adolescents  
10  
11 were then asked about the sports activity they usually practiced in organized or non-organized  
12  
13 contexts.  
14

### 15 16 **Procedures**

17  
18 Questionnaires were administered in schools in January 2002, 2006 and 2010, and  
19  
20 were answered anonymously. Participation in the study was voluntary. The administration of  
21  
22 the surveys was conducted according to standard guidelines from the HBSC survey  
23  
24 protocol[16] and it was carried out by trained school teachers during class time.  
25  
26

### 27 28 **Analysis**

29  
30 Adolescents were grouped into two age groups (11-13 and 15-17). Descriptive  
31  
32 statistics were calculated for all variables (means, standard deviation and percentages) for the  
33  
34 entire sample and according to HBSC survey years (2002, 2006, and 2010), age group, and  
35  
36 sex. ANOVA and chi-square were used to assess the differences among HBSC survey years  
37  
38 in each age group. Independent t-tests and chi-square were used to compare adolescents from  
39  
40 different cohorts. All statistical analyses were performed using IBM SPSS Statistics 20.0. The  
41  
42 level of significance was set at 0.05.  
43  
44  
45  
46

## 47 48 **RESULTS**

49  
50 Sample characteristics and displayed in table 1.  
51  
52  
53

54  
55 Table 1. Characteristics of participants.

|       | Cohorts |      |      |
|-------|---------|------|------|
| Total | 2002    | 2006 | 2010 |
|       |         |      |      |

|              | n                  | %                 | n    | %    | n    | %    | n                  | %    |
|--------------|--------------------|-------------------|------|------|------|------|--------------------|------|
| Sex          |                    |                   |      |      |      |      |                    |      |
| Boys         | 4067               | 47.9              | 1466 | 48.5 | 1261 | 49.3 | 1340               | 46.1 |
| Girls        | 4416               | 52.1              | 1557 | 51.5 | 1298 | 50.7 | 1561 <del>4</del>  | 53.9 |
| Age          |                    |                   |      |      |      |      |                    |      |
| 11-13        | 4266               | 50.3              | 1746 | 57.8 | 1275 | 49.8 | 1245               | 42.9 |
| 15-17        | 421 <del>720</del> | 49.7              | 1277 | 42.2 | 1284 | 50.2 | 165 <del>69</del>  | 57.1 |
| School grade |                    |                   |      |      |      |      |                    |      |
| Sixth grade  | 4348               | 51. <del>32</del> | 1809 | 59.8 | 1275 | 49.8 | 1264               | 43.5 |
| Tenth grade  | 413 <del>58</del>  | 48. <del>78</del> | 1214 | 40.2 | 1284 | 50.2 | 163 <del>740</del> | 56.5 |

Descriptive statistics and the differences among HBSC survey years for each age group and sex are presented in table 2.

For the boys aged 11-13, the number of times they reported practicing PA during the last 7 days was between 4.2±2.1 to 4.4±2.1 times. At the age of 15-17 they reported practicing 3.5±1.9 times a week in 2002, 3.9±1.9 in 2006 and 3.8±1.9 in 2010, with a significant increase from 2002 to 2006/2010 ( $p<0.05$ ). In both age groups the prevalence of PA over the last 6 months decreased slightly between 2006 and 2010, but decreased significantly between 2006 and 2010 ( $p<0.05$  and  $p<0.01$ ). Soccer was the most practiced sports activity, but over the years there was a significant decline in the number of participants ( $p<0.001$  for both age-groups). On the other hand, gymnastics participation decreased from 2002 to 2006 and then increased from 2006 to 2010, reaching the higher value in 2010 for the ages of 11-13 ( $p<0.05$ ) and 15-17 years ( $p<0.05$ ). The type of PA practiced changed over the years for the younger participants, decreasing the number of team sports participants and increasing participation in individual sports ( $p<0.01$ ). Boys, younger and older, preferred team sports activities more than individual activities. However, over the years, young boys participation in team sports decreased progressively from 2002 to 2010 ( $p<0.01$ ).

Girls reported practicing PA between 3.3±1.9 to 3.5±1.9 at the age of 11-13, and 2.7±1.9 to 2.9±1.7 at the age of 15-17. Soccer, gymnastics, and swimming were the most popular sports activities. Over the years, the number of soccer practitioners significantly decreased among younger girls ( $p<0.001$ ). For the older girls, the number of participants



decreased significantly from 2002 to 2006 and then increased significantly from 2006 to 2010 ( $p<0.001$ ). In respect to gymnastics, the number of participants decreased significantly from 2002 to 2006/2010 for both younger ( $p<0.01$ ) and older girls ( $p<0.01$ ). The number of older girls that practiced volleyball was inconsistent, decreasing significantly from 2002 to 2006 and increasing significantly again from 2006 to 2010 ( $p<0.05$ ). Girls aged 11-13, preferred individual sports activities rather than team sports activities over the years ( $p<0.05$ ). On the other hand, among older girls, participants in individual sports activities decreased significantly from 2006 to 2010 ( $p<0.01$ ).

Table 2. Boys' and girls' physical activity participation in 2002, 2006 and 2010, according age group.

|                                           | 11-13 years     |                 |                 |          | 15-17 years     |                 |                 |                    |
|-------------------------------------------|-----------------|-----------------|-----------------|----------|-----------------|-----------------|-----------------|--------------------|
|                                           | 2002<br>(n=865) | 2006<br>(n=686) | 2010<br>(n=625) | <i>p</i> | 2002<br>(n=601) | 2006<br>(n=575) | 2010<br>(n=715) | <i>p</i>           |
| <b>Boys</b>                               |                 |                 |                 |          |                 |                 |                 |                    |
| PA in the last 7 days (M±SD) <sup>1</sup> | 4.2±2.1         | 4.4±2.1         | 4.3±2.1         | 0.243    | 3.5±1.9         | 3.9±1.9         | 3.8±1.9         | 0.019 <sup>a</sup> |
| PA in the last 6 month (%) <sup>2</sup>   |                 |                 |                 | 0.012    |                 |                 |                 | 0.001              |
| Did not practice PA                       | 5.4             | 5.5             | 9.0             |          | 11.1            | 12.9            | 18.0            |                    |
| Practiced PA                              | 94.6            | 94.5            | 91.0            |          | 88.9            | 87.1            | 82.0            |                    |
| Sports practiced (%) <sup>2</sup>         |                 |                 |                 |          |                 |                 |                 |                    |
| Soccer                                    | 72.6            | 69.8            | 60.8            | <0.001   | 57.1            | 50.1            | 44.3            | <0.001             |
| Basketball                                | 22.1            | 26.4            | 22.4            | 0.102    | 16.6            | 12.7            | 13.7            | 0.130              |
| Volleyball                                | 8.6             | 12.4            | 10.6            | 0.089    | 9.2             | 7.8             | 8.1             | 0.683              |
| Handball                                  | 9.7             | 11.8            | 11.2            | 0.388    | 8.3             | 7.1             | 7.0             | 0.619              |
| Swimming                                  | 18.0            | 15.3            | 17.3            | 0.352    | 15.8            | 13.6            | 15.5            | 0.500              |
| Athletics                                 | 12.7            | 13.8            | 13.1            | 0.806    | 8.2             | 7.7             | 9.2             | 0.575              |
| Gymnastics                                | 17.5            | 17.1            | 22.2            | 0.027    | 7.0             | 3.8             | 6.7             | 0.038              |
| Cycling                                   | 22.7            | 24.2            | 21.4            | 0.490    | 18.5            | 16.7            | 14.7            | 0.181              |
| Type of sport activity <sup>2</sup>       |                 |                 |                 | 0.008    |                 |                 |                 | 0.524              |
| Individual                                | 8.7             | 8.3             | 13.0            |          | 13.3            | 13.6            | 13.4            |                    |
| Team                                      | 40.9            | 38.2            | 33.8            |          | 41.3            | 38.4            | 33.0            |                    |
| Individual and collective                 | 38.5            | 37.8            | 34.9            |          | 24.6            | 19.7            | 19.7            |                    |
| <b>Girls</b>                              |                 |                 |                 |          |                 |                 |                 |                    |
| PA in the last 7 days (M±SD) <sup>1</sup> | 3.5±1.9         | 3.3±1.9         | 3.4±1.9         | 0.456    | 2.7±1.9         | 2.7±1.7         | 2.9±1.7         | 0.056              |
| PA in the last 6 month (%) <sup>2</sup>   |                 |                 |                 | 0.491    |                 |                 |                 | 0.745              |
| Did not practice PA                       | 15.7            | 13.4            | 14.8            |          | 31.8            | 30.7            | 32.5            |                    |
| Practiced PA                              | 84.3            | 86.6            | 85.2            |          | 68.2            | 69.3            | 67.5            |                    |
| Sports practiced (%) <sup>2</sup>         |                 |                 |                 |          |                 |                 |                 |                    |
| Soccer                                    | 35.3            | 31.4            | 25.8            | <0.001   | 15.7            | 9.7             | 16.7            | <0.001             |
| Basketball                                | 17.8            | 16.6            | 18.7            | 0.640    | 9.3             | 7.2             | 9.6             | 0.189              |
| Volleyball                                | 14.0            | 11.0            | 10.3            | 0.069    | 13.6            | 9.7             | 14.5            | 0.012              |
| Handball                                  | 6.1             | 6.3             | 8.4             | 0.191    | 2.7             | 3.8             | 5.8             | 0.006              |
| Swim                                      | 25.0            | 21.2            | 21.0            | 0.112    | 13.5            | 14.8            | 13.9            | 0.757              |

|                                     |      |      |      |       |      |      |      |       |
|-------------------------------------|------|------|------|-------|------|------|------|-------|
| Athletics                           | 12.4 | 11.0 | 13.7 | 0.370 | 5.8  | 5.4  | 7.5  | 0.155 |
| Gymnastics                          | 36.1 | 28.4 | 29.4 | 0.002 | 15.4 | 10.4 | 9.5  | 0.001 |
| Cycling                             | 12.8 | 10.7 | 10.0 | 0.195 | 6.2  | 6.1  | 6.1  | 0.993 |
| Type of sport activity <sup>2</sup> |      |      |      | 0.015 |      |      |      | 0.002 |
| Individual                          | 28.0 | 26.8 | 28.4 |       | 21.2 | 21.6 | 16.3 |       |
| Team                                | 17.0 | 21.1 | 14.7 |       | 19.2 | 13.7 | 18.8 |       |
| Individual and collective           | 30.0 | 23.2 | 25.0 |       | 11.4 | 8.5  | 12.0 |       |

PA, physical activity

<sup>1</sup> Tested by ANOVA.

<sup>2</sup> Tested by Chi Square.

<sup>a</sup> Data from 2002 is statically different from 2006 and 2010. Tested by Tukey's HSD.

Table 3 presents PA information from 2 different cohorts, 4 years apart. Among boys, PA practices during the last 7 days decreased from  $4.2 \pm 2.1$  to  $3.9 \pm 1.9$  between 2002 and 2006 ( $p < 0.001$ ) and decreased  $4.4 \pm 2.1$  to  $3.8 \pm 1.9$  between 2006 and 2010 ( $p < 0.001$ ). The prevalence of PA practiced over the last 6 month also declined significantly in both cohorts ( $p < 0.001$ ). Looking at the different sports activities, the number of practitioners decreased over the years in almost all activities. It is noteworthy that only volleyball from 2002 to 2006 and swimming from 2006 to 2010 remained relatively stable. In both cohorts, as age increased the number of participants of team sports activities declined, and, in contrast, participants of individual activities significantly increased ( $p < 0.001$ ).

Among girls, PA practices during the last 7 days declined significantly from  $3.5 \pm 1.9$  to  $2.7 \pm 1.7$  between 2002 and 2006 ( $p < 0.001$ ), and from  $3.3 \pm 1.9$  to  $2.9 \pm 1.7$  between 2006 and 2010 ( $p < 0.001$ ). Similar to what was observed among boys, the prevalence of PA over the last 6 months decreased in both cohorts ( $p < 0.001$ ). The practice of PA decreased significantly in all sports activities from 2002 to 2006. Data from 2006 and 2010 shows that the practice of PA also declined, with the exception of handball which remained stable and volleyball which, in contrast to other sports, had a marginally significant increase ( $p = 0.052$ ). Girls team and individual sports participation decreased between 2002 and 2006 ( $p < 0.001$ ) and between 2006 and 2010 ( $p < 0.01$ ).

Table 3. Boys' and girls' physical activity participation over the years.

|                                           | 2002                   | 2006                   | <i>p</i> | 2006                   | 2010                   | <i>p</i> |
|-------------------------------------------|------------------------|------------------------|----------|------------------------|------------------------|----------|
|                                           | 11-13 years<br>(n=865) | 15-17 years<br>(n=575) |          | 11-13 years<br>(n=686) | 15-17 years<br>(n=715) |          |
| <b>Boys</b>                               |                        |                        |          |                        |                        |          |
| PA in the last 7 days (M±SD) <sup>1</sup> | 4.2±2.1                | 3.9±1.9                | 0.001    | 4.4±2.1                | 3.8±1.9                | <0.001   |
| PA in the last 6 month (%) <sup>2</sup>   |                        |                        | <0.001   |                        |                        | <0.001   |
| Did not practice PA                       | 5.4                    | 12.6                   |          | 5.5                    | 18.0                   |          |
| Practiced PA                              | 94.6                   | 87.4                   |          | 94.5                   | 82.0                   |          |
| Sports practiced (%) <sup>2</sup>         |                        |                        |          |                        |                        |          |
| Soccer                                    | 72.6                   | 51.1                   | <0.001   | 69.8                   | 45.1                   | <0.001   |
| Basketball                                | 22.1                   | 13.9                   | <0.001   | 26.4                   | 14.0                   | <0.001   |
| Volleyball                                | 8.6                    | 8.6                    | 0.082    | 12.4                   | 9.1                    | 0.010    |
| Handball                                  | 9.7                    | 6.9                    | 0.104    | 11.8                   | 7.2                    | 0.002    |
| Swimming                                  | 18.0                   | 13.6                   | 0.029    | 15.3                   | 15.2                   | 0.941    |
| Athletics                                 | 12.7                   | 7.8                    | 0.002    | 13.8                   | 9.3                    | 0.007    |
| Gymnastics                                | 17.5                   | 4.7                    | <0.001   | 17.1                   | 7.1                    | <0.001   |
| Cycling                                   | 22.7                   | 17.0                   | 0.006    | 24.2                   | 14.8                   | <0.001   |
| Type of sport activity <sup>2</sup>       |                        |                        | <0.001   |                        |                        | <0.001   |
| Individual                                | 8.7                    | 13.6                   |          | 8.3                    | 13.4                   |          |
| Team                                      | 40.9                   | 38.4                   |          | 38.2                   | 33.0                   |          |
| Individual and collective                 | 38.5                   | 19.7                   |          | 37.8                   | 19.7                   |          |
| <b>Girls</b>                              |                        |                        |          |                        |                        |          |
| PA in the last 7 days (M±SD) <sup>1</sup> | 3.5±1.9                | 2.7±1.7                | <0.001   | 3.3±1.9                | 2.9±1.7                | <0.001   |
| PA in the last 6 month (%) <sup>2</sup>   |                        |                        | <0.001   |                        |                        | <0.001   |
| Did not practice PA                       | 15.7                   | 30.1                   |          | 13.4                   | 32.1                   |          |
| Practiced PA                              | 84.3                   | 69.9                   |          | 86.6                   | 67.9                   |          |
| Sports practiced (%) <sup>2</sup>         |                        |                        |          |                        |                        |          |
| Soccer                                    | 35.3                   | 11.1                   | <0.001   | 31.4                   | 16.6                   | <0.001   |
| Basketball                                | 17.8                   | 7.5                    | <0.001   | 16.6                   | 9.7                    | <0.001   |
| Volleyball                                | 14.0                   | 10.0                   | 0.011    | 11.0                   | 14.5                   | 0.052    |
| Handball                                  | 6.1                    | 3.7                    | 0.039    | 6.3                    | 5.9                    | 0.741    |
| Swimming                                  | 25.0                   | 14.8                   | <0.001   | 21.2                   | 13.7                   | <0.001   |
| Athletics                                 | 12.4                   | 5.2                    | <0.001   | 11.0                   | 7.4                    | 0.021    |
| Gymnastics                                | 36.1                   | 11.1                   | <0.001   | 28.4                   | 10.0                   | <0.001   |
| Cycling                                   | 12.8                   | 6.1                    | <0.001   | 10.7                   | 6.1                    | 0.002    |
| Type of sport activity <sup>2</sup>       |                        |                        | <0.001   |                        |                        | 0.004    |
| Individual                                | 28.0                   | 21.6                   |          | 26.8                   | 16.3                   |          |
| Team                                      | 17.0                   | 13.7                   |          | 21.1                   | 18.8                   |          |
| Individual and collective                 | 30.0                   | 8.5                    |          | 23.2                   | 12.0                   |          |

<sup>1</sup> Tested by t Test.

<sup>2</sup> Tested by Chi Square.

## DISCUSSION

This is the first study among Portuguese adolescents to explore the PA [and sport participation practices](#) of different cohorts, collecting data through the same standard protocol. The goal of the study was, using three-cohort of representative samples of Portuguese adolescents, to investigate the prevalence of PA [and sport participation](#) among Portuguese adolescents, and understand how it changed between 2002 and 2010. Overall, the

1  
2  
3 study points to age as a factor related to diminished PA participation. The study also revealed  
4  
5 that the prevalence of PA and sport participation has decreased over the years for the same  
6  
7 age groups.  
8

9  
10 Younger and older adolescents reported practicing PA less than 7 times a week.  
11  
12 Although it was not assessed the duration and intensity of PA, results indicated that  
13  
14 adolescents do not get enough practiced to meet the recommended levels of 60 minutes of  
15  
16 moderate to vigorous PA each day.[5] This is in line with other recent studies among  
17  
18 Portuguese people that described the prevalence of PA.[8, 12] Because our data is from  
19  
20 different HBSC waves, it was possible to observe the evolution of PA in each age group over  
21  
22 the 2002-2010 time frames. With the exception of boys aged 15-17, there were no significant  
23  
24 changes over the years in regard to PA practiced during the last 7 days. Moreover, there was a  
25  
26 decrease in the prevalence of PA over the last 6 months, especially among boys. These results  
27  
28 can be interpreted in several different ways. First, strategies to increase the number of times  
29  
30 that adolescents practice PA have not been successful. Second, adolescents and adults may  
31  
32 not be aware of the recommended levels of PA for young people. Consequently they might  
33  
34 assume that they are active enough and therefore may conclude that there is no need to be  
35  
36 more physically active.[20] Third, schools, even though called to give greater attention to  
37  
38 provision of PA for students,[21] seem to have failed at promoting PA. Results indicate that  
39  
40 there has been no progress made toward attaining this goal.  
41  
42  
43  
44

45 Adolescent behaviorbehaviour, such as PA and inactivity over the years, is an issue  
46  
47 rarely studied in Portugal. This type of study is important and should be of interest on a  
48  
49 national and international level because it helps policy makers, educators and health  
50  
51 professionals to understand young people's health in their social context and tracks changes  
52  
53 as they develop over the years. Therefore, with data from successive surveys, trends can be  
54  
55 identified making it possible to evaluate more accurately the impact of programs and  
56  
57  
58  
59  
60

1  
2  
3 strategies implemented in order to promote PA and reduce sedentary ~~behavior~~behaviour  
4  
5 among adolescents. While the HBSC conducts national[13-15] and international systematic  
6  
7 surveys,[6, 16] in the United States of America, the Center for Disease Control and  
8  
9 Prevention also conducts a periodic survey of adolescent health risk and health protective  
10  
11 ~~behaviors~~behaviours. [22] This shows the importance of studying and tracking adolescent  
12  
13 ~~behavior~~behaviour and allows cross-national comparisons.  
14  
15

16  
17 The trend of PA declining with age was significant among boys and girls in the two  
18  
19 different cohorts of adolescents (2002 to 2006 and 2006 to 2010). These results are similar to  
20  
21 those found in others studies with adolescents from Portugal[23] and other countries.[6, 7] In  
22  
23 Europe, the inverse relationship between PA and age is common in most countries.[6]  
24  
25 Riddoch et al.[24], in what is considered the first study to objectively measure physical  
26  
27 activity with a representative sample of European children, verified that 9 year old children  
28  
29 were considerably more active than 15 year old adolescents, presenting similar results in all  
30  
31 countries. Virtually all 9 year old children practiced the recommended amount of PA, or more  
32  
33 than recommended, while only a small percentage of 15 year olds did so. This indicated that  
34  
35 as age increased PA decreased.  
36  
37

38  
39 The decline of PA with age has triggered much discussion in the scientific community.  
40  
41 Sallis[25] ~~analyzed~~analysed various studies related to the decline of PA, and concluded that  
42  
43 the ages between 13 and 18 are at risk. Having also observed the decline in animals, the  
44  
45 author was lead to suppose that the decline had a biological origin. The consistency of the  
46  
47 results of the Riddoch et al.[24] among adolescents from different countries is in some way  
48  
49 congruent with Sallis'[25] assumptions, allowing one to conclude that children's and  
50  
51 adolescents' PA is probably determined biologically. However, although the effect of age is  
52  
53 significant on PA, it sometimes only explained 1% of the variability[26] which means that the  
54  
55 decline in PA with age could be related to other factors such as the great academic pressure  
56  
57  
58  
59  
60

1  
2  
3 adolescents are under,[27] longer time in sedentary activities such as screen time [28], and  
4  
5 having part-time jobs to earn some money.[29] Therefore, qualitative studies to understand  
6  
7 clearly the reasons for the decrease in PA among adolescents are needed.  
8

9  
10 Soccer was the most practiced sports activity among boys and older girls over the  
11  
12 years and at different ages. This is understandable since it is the most popular sports activity  
13  
14 in Portugal and it is the activity with the most participants.[30, 31] Nevertheless, the number  
15  
16 of participants decreased over the years within both age-groups. As the number of participants  
17  
18 in others sports activities did not increase significantly, this suggests that the decrease of  
19  
20 soccer participants might be related to the prevalence of adolescents who did not practice PA  
21  
22 over the last 6 month. This shows the importance of soccer as a sports activity among  
23  
24 Portuguese adolescents. Thus, when considering an intervention aimed to increase PA, soccer  
25  
26 should be considered as an activity that attracts adolescents.  
27  
28

29  
30 The type of activity practiced by boys has the tendency to change over the years.  
31  
32 While the number of team sports participants decreased between 11-13 and 15-17 years,  
33  
34 participation in individual sports increased. On the other hand, for the girls, participation in  
35  
36 both individual and team sports decreased with age. The reason for the choice of individual or  
37  
38 team sports may be related to social factors, and some could argue that team sports would be  
39  
40 better for the development of social skills. However, studies have shown that there is no  
41  
42 difference in social self-esteem between participants in individual or team sports.[32, 33] For  
43  
44 the older boys the increased participation in individual sports may be related to their level of  
45  
46 autonomy.  
47  
48

49  
50 The present study had some limitations. Measurements of PA were based on self-  
51  
52 report. Self-report generally has limited reliability and validity.[34] So, the use of accurate  
53  
54 objective measures is preferable, but it is not often feasible in epidemiological studies with  
55  
56 large samples. Moreover, the intensity and duration of PA ~~sessions~~were not measured. These  
57  
58  
59  
60

1  
2  
3 evaluations would be useful in determining the prevalence of adolescents who attained  
4  
5 recommended levels of PA.  
6

7  
8 There are also several strengths in the present study. First, data from a representative  
9  
10 sample was collected. Second, data from three different cohorts was collected (2002, 2006  
11  
12 and 2010), using a standard protocol, which allows for comparisons and for understanding of  
13  
14 the differences of PA over the years in two different age groups of boys and girls.  
15

## 16 17 18 **CONCLUSION** 19

20  
21 The prevalence of physical inactivity increased significantly among boys between ages  
22  
23 11-13 and 15-17, but not in girls. The number of times adolescents practiced PA during the  
24  
25 last 7 days remained relatively stable, which means that the campaigns and attempts to  
26  
27 increase PA among adolescents have not been very successful. With age, there was a  
28  
29 significant decrease in most sports activities among boys and girls. This indicated that as  
30  
31 adolescents are getting older they may have different interests leading some to stop practicing  
32  
33 PA. These findings imply that it is important to more effectively promote PA among  
34  
35 adolescents, using different strategies based on age and sex.  
36  
37  
38  
39

## 40 **Acknowledgments** 41

42  
43 The authors thank the adolescents for their participation in the study. We also thank  
44  
45 Joyce Voelker for revising the document.  
46  
47

## 48 49 **Funding** 50

51  
52 The HBSC study in Portugal was funded by public funds: Ministry of Health and  
53  
54 Ministry of Education and Science.  
55  
56  
57  
58  
59  
60

### Competing interests

The authors declare that they have no competing interests.

### REFERENCES

1. Janssen I, Leblanc AG. Systematic review of the health benefits of physical activity and fitness in school-aged children and youth. *Int J Behav Nutr Phys Act* 2010;7:40.
2. Allender S, Kremer P, de Silva-Sanigorski A, Lacy K, Millar L, Mathews L, et al. Associations between activity-related behaviours and standardized BMI among Australian adolescents. *J Sci Med Sport* 2011;14:512-21.
3. Santos MP, Oliveira J, Ribeiro JC, Mota J. Active travel to school, BMI and participation in organised and non-organised physical activity among Portuguese adolescents. *Prev Med* 2009;49:497-9.
4. Telama R, Yang X, Viikari J, Valimaki I, Wanne O, Raitakari O. Physical activity from childhood to adulthood: a 21-year tracking study. *Am J Prev Med* 2005;28:267-73.
5. WHO. Global recommendations on physical activity for health. Geneva, Suíça: World Health Organization; 2010.
6. Currie C, Zanotti C, Morgan A, Currie D, de Looze M, Roberts C, et al. Social determinants of health and well-being among young people. Health Behaviour in School-aged Children (HBSC) study: International Report From the 2009/2010 survey. Copenhagen: WHO Regional Office for Europe; 2012.
7. Hallal PC, Andersen LB, Bull FC, Guthold R, Haskell W, Ekelund U. Global physical activity levels: surveillance progress, pitfalls, and prospects. *Lancet* 2012;380:247-57.
8. Baptista F, Santos DA, Silva AM, Mota J, Santos R, Vale S, et al. Prevalence of the Portuguese population attaining sufficient physical activity. *Med Sci Sports Exerc* 2012;44:466-73.



- 1  
2  
3 9. Marques A, André J, Martins J, Sarmiento H, Diniz J. The prevalence of sedentary  
4 behaviours and physical activity of urban adolescents. A cross-sectional study using  
5 ecological momentary assessment. *Mitt Klosterneuburg* 2014;64:427-35.
- 6  
7  
8  
9  
10 10. Woods CB, Tannehill D, Quinlan A, Moyna N, Walsh J. Children's sport participation  
11 and physical activity study (CSPPA). Dublin, Ireland: Dublin City University and Irish Sports  
12 Council, 2010.
- 13  
14  
15  
16 11. Wichstrom L, von Soest T, Kvaalem IL. Predictors of growth and decline in leisure  
17 time physical activity from adolescence to adulthood. *Health Psychol* 2013;32:775-84.
- 18  
19  
20  
21 12. Marques A, Carreiro da Costa F. Levels of physical activity of urban adolescents  
22 according to age and gender. *Int J Sports Sci* 2013;3:23-7.
- 23  
24  
25  
26 13. Matos MG, Equipa Aventura Social. A saúde dos adolescentes portugueses (Quatro  
27 anos depois) [The health of Portuguese adolescents (Four years later)]. Lisboa: Edições FMH;  
28 2003.
- 29  
30  
31  
32 14. Matos MG, Equipa Aventura Social. A Saúde dos Adolescentes Portugueses - Hoje e  
33 em 8 anos - Relatório Preliminar do Estudo HBSC 2006 [The Portuguese Adolescent Health  
34 - Today and in eight years - Preliminary Report of the HBSC study in 2006]. Cruz Quebrada:  
35 Faculdade de Motricidade Humana; 2006.
- 36  
37  
38  
39  
40  
41 15. Matos MG, Simões C, Tomé G, Camacho I, Ferreira M, L. R, et al. Aventura social &  
42 saúde. A saúde dos adolescentes portugueses. Relatório do estudo HBSC 2010 [Social  
43 adventure & Health. The health of Portuguese adolescents. Report of the 2010 HBSC study].  
44 Cruz-Quebrada: Faculdade de Motricidade Humana; 2011.
- 45  
46  
47  
48  
49  
50 16. Currie C, Hurrelmann K, Settertobulte W, Smith R, Todd J. Health and health  
51 behavior among young people. *Health Behaviour in School-aged Children: a WHO cross-*  
52 *national study (HBSC)*. Copenhagen: World Health Organization; 2000.
- 53  
54  
55  
56  
57  
58  
59  
60

- 1  
2  
3 17. Currie C. Health Behaviour in School-Aged Children. Research protocol for the 1997-  
4 98 survey. A World Health Organization Cross-National Study. Edinburgh University of  
5  
6  
7  
8  
9  
10 18. Caspersen CJ, Powell KE, Christenson GM. Physical activity, exercise, and physical  
11  
12 fitness: definitions and distinctions for health-related research. Public Health Rep  
13  
14 1985;100:126-31.  
15  
16 19. Sallis JF, Buono MJ, Roby JJ, Micale FG, Nelson JA. Seven-day recall and other  
17  
18 physical activity self-reports in children and adolescents. Med Sci Sports Exerc 1993;25:99-  
19  
20 108.  
21  
22 20. Marques A, Martins J, Ramos M, Yazigi F, Carreiro da Costa F. Perception and reality  
23  
24 - Portuguese adults' awareness of active lifestyle. Eur J Sport Sci 2013;14:468-74.  
25  
26 21. Pate RR, Davis MG, Robinson TN, Stone EJ, McKenzie TL, Young JC. Promoting  
27  
28 physical activity in children and youth: a leadership role for schools: a scientific statement  
29  
30 from the American Heart Association Council on Nutrition, Physical Activity, and  
31  
32 Metabolism (Physical Activity Committee) in collaboration with the Councils on  
33  
34 Cardiovascular Disease in the Young and Cardiovascular Nursing. Circulation  
35  
36 2006;114:1214-24.  
37  
38 22. Brener ND, Kann L, Shanklin S, Kinchen S, Eaton DK, Hawkins J, et al. Methodology  
39  
40 of the Youth Risk Behavior Surveillance System--2013. MMWR - Recommendations and  
41  
42 Reports 2013;62:1-20.  
43  
44 23. Seabra AFTE, Ribeiro Maia JA, Mendonca DM, Thomis M, Caspersen CJ, Fulton JE.  
45  
46 Age and sex differences in physical activity of Portuguese adolescents. Med Sci Sports Exerc  
47  
48 2008;40:65-70.  
49  
50  
51  
52  
53  
54  
55  
56  
57  
58  
59  
60

- 1  
2  
3 24. Riddoch CJ, Bo Andersen L, Wedderkopp N, Harro M, Klasson-Heggebo L, Sardinha  
4 LB, et al. Physical activity levels and patterns of 9- and 15-yr-old European children. *Med Sci*  
5 *Sports Exerc* 2004;36:86-92.
- 6  
7  
8  
9 25. Sallis JF. Age-related decline in physical activity: a synthesis of human and animal  
10 studies. *Med Sci Sports Exerc* 2000;32:1598-600.
- 11  
12  
13 26. Cantera-Garde M, Devís-Devís J. Physical activity levels of secondary school Spanish  
14 adolescents. *Eur J Phys Educ* 2000;5:28-44.
- 15  
16  
17  
18 27. Lee KS, Trost SG. Physical activity patterns of Singaporean adolescents. *Pediatr Exerc*  
19 *Sci* 2006;18:400-14.
- 20  
21  
22  
23 28. Sharif I, Sargent JD. Association between television, movie, and video game exposure  
24 and school performance. *Pediatrics* 2006;118:E1061-E70.
- 25  
26  
27 29. Malina R, Bouchard C, Bar-Or O. Risk factors during growth and adult health. In:  
28 Malina R, Bouchard C, Bar-Or O, editors. *Growth, maturation, and physical activity*.  
29 Champaign: Human Kinetics; 2004. p. 587-608.
- 30  
31  
32  
33 30. Costa V, Serôdio-Fernandes A, Maia M. Hábitos desportivos dos jovens do interior  
34 norte e litoral norte de Portugal. *Rev Port Ciênc Desporto* 2009;9:46-55.
- 35  
36  
37  
38 31. Marivoet S. Hábitos desportivos da população portuguesa. Lisboa: Ministério da  
39 Juventude e do Desporto. Instituto Nacional de Formação e Estudos do Desporto; 2001.
- 40  
41  
42  
43 32. Dinc Z. Social Self-Efficacy of Adolescents Who Participate in Individual and Team  
44 Sports. *Soc Behav Personal* 2011;39:1417-23.
- 45  
46  
47  
48 33. Wann DL, Lingle SE. Comparison of Team and Individual Sports Participants  
49 Tendencies to Join Groups. *Percept Motor Skill* 1994;79:833-4.
- 50  
51  
52  
53 34. Shephard RJ. Limits to the measurement of habitual physical activity by  
54 questionnaires. *Brit J Sport Med* 2003;37:197-206.
- 55  
56  
57  
58  
59  
60

## Research checklists

|                              | Item No | Recommendation                                                                                                                                                                                |
|------------------------------|---------|-----------------------------------------------------------------------------------------------------------------------------------------------------------------------------------------------|
| <b>Title and abstract</b>    | 1       | Indicate the study's design with a commonly used term in the title or the abstract.<br>Provide in the abstract an informative and balanced summary of what was done and what was found.       |
| <b>Introduction</b>          |         |                                                                                                                                                                                               |
| Background/rationale         | 2       | Explain the scientific background and rationale for the investigation being reported.                                                                                                         |
| Objectives                   | 3       | State specific objectives.                                                                                                                                                                    |
| <b>Methods</b>               |         |                                                                                                                                                                                               |
| Study design                 | 4       | Present key elements of study design early in the paper                                                                                                                                       |
| Setting                      | 5       | Describe the setting, locations, and relevant dates, including periods of recruitment, exposure, follow-up, and data collection                                                               |
| Participants                 | 6       | Give the sources and methods of selection of participants.                                                                                                                                    |
| Variables                    | 7       | Clearly define all outcomes, exposures, predictors, potential confounders, and effect modifiers.                                                                                              |
| Data sources/<br>measurement | 8       | For each variable of interest, give sources of data and details of methods of assessment (measurement).                                                                                       |
| Bias                         | 9       | Describe any efforts to address potential sources of bias                                                                                                                                     |
| Quantitative variables       | 10      | Explain how quantitative variables were handled in the analyses.                                                                                                                              |
| Statistical methods          | 11      | Describe all statistical methods                                                                                                                                                              |
| <b>Results</b>               |         |                                                                                                                                                                                               |
| Participants                 | 12      | Report numbers of individuals at each stage of study.                                                                                                                                         |
| Descriptive data             | 13      | Give characteristics of study participants.                                                                                                                                                   |
| Outcome data                 | 14      | Report numbers of outcome events or summary measures over time                                                                                                                                |
| Main results                 | 15      | Give estimates and, if applicable, confounder-adjusted estimates and their precision (eg, 95% confidence interval). Make clear which confounders were adjusted for and why they were included |
| Other analyses               | 16      | Report other analyses done—eg analyses of subgroups and interactions, and sensitivity analyses                                                                                                |
| <b>Discussion</b>            |         |                                                                                                                                                                                               |
| Key results                  | 17      | Summarise key results with reference to study objectives.                                                                                                                                     |
| Limitations                  | 18      | Discuss limitations of the study, taking into account sources of potential bias or imprecision. Discuss both direction and magnitude of any potential bias.                                   |
| Interpretation               | 19      | Give a cautious overall interpretation of results considering objectives, limitations, multiplicity of analyses, results from similar studies, and other relevant evidence.                   |
| Generalisability             | 20      | Discuss the generalisability of the study results.                                                                                                                                            |
| <b>Other information</b>     |         |                                                                                                                                                                                               |
| Funding                      | 21      | Give the source of funding and the role of the funders for the present study and, if applicable, for the original study on which the present article is based                                 |
